# Supplementary material for: Metal phosphine aldehyde complexes and their application in Cu-free Sonogashira and Suzuki–Miyaura cross-coupling reactions
Source: Royal Society of Chemistry journal article supplement (doi:10.1039/d3dt00507k), 2023-01-01
Supplement: d3dt00507k1.pdf [file d3dt00507k1.pdf]

# Electronic Supporting Information (ESI)

## ***Metal phosphine aldehyde complexes and their application in Cu-free Sonogashira and Suzuki–Miyaura cross-coupling reactions***

Saral Baweja<sup>a</sup>, Tom Gabler<sup>a</sup>, Peter Lönnecke<sup>a</sup> and Evamarie Hey-Hawkins<sup>a\*</sup>

<sup>a</sup> Faculty of Chemistry and Mineralogy, Institute of Inorganic Chemistry, Leipzig University  
Johannisallee 29, D-04103 Leipzig, Germany, E-mail: hey@uni-leipzig.de

### Contents

|                                                                                                                                        |    |
|----------------------------------------------------------------------------------------------------------------------------------------|----|
| 1. NMR Data .....                                                                                                                      | 2  |
| 3-(Diphenylphosphino)propanal ( <b>PCHO</b> ) .....                                                                                    | 2  |
| [{PdCl( $\mu$ -Cl)( <b>PCHO</b> - $\kappa$ P)} <sub>2</sub> ] ( <b>1</b> ) .....                                                       | 5  |
| <i>trans</i> -[PdCl <sub>2</sub> ( <b>PCHO</b> - $\kappa$ P) <sub>2</sub> ] ( <b>2</b> ) .....                                         | 8  |
| <i>trans</i> -[PtCl <sub>2</sub> ( <b>PCHO</b> - $\kappa$ P) <sub>2</sub> ] ( <b>3</b> ) .....                                         | 11 |
| <i>cis</i> -[PtCl <sub>2</sub> ( <b>PCHO</b> - $\kappa$ P) <sub>2</sub> ] ( <b>4</b> ) .....                                           | 14 |
| 2. X-Ray Diffraction Analyses .....                                                                                                    | 17 |
| Molecular structures .....                                                                                                             | 18 |
| Selected bond lengths and bond angles .....                                                                                            | 20 |
| 3. Isolation Experiments .....                                                                                                         | 25 |
| 4. Tests for the homogeneous/heterogeneous nature of the catalyst .....                                                                | 28 |
| 5. DFT Calculations for <i>cis</i> - and <i>trans</i> -[MCl <sub>2</sub> ( <b>PCHO</b> - $\kappa$ P) <sub>2</sub> ] (M = Pd, Pt) ..... | 31 |
| 6. <i>trans</i> -[PdCl <sub>2</sub> (PPh <sub>2</sub> nBu) <sub>2</sub> ] .....                                                        | 43 |
| 7. References .....                                                                                                                    | 45 |

## 1. NMR Data

### 3-(Diphenylphosphino)propanal (**PCHO**)

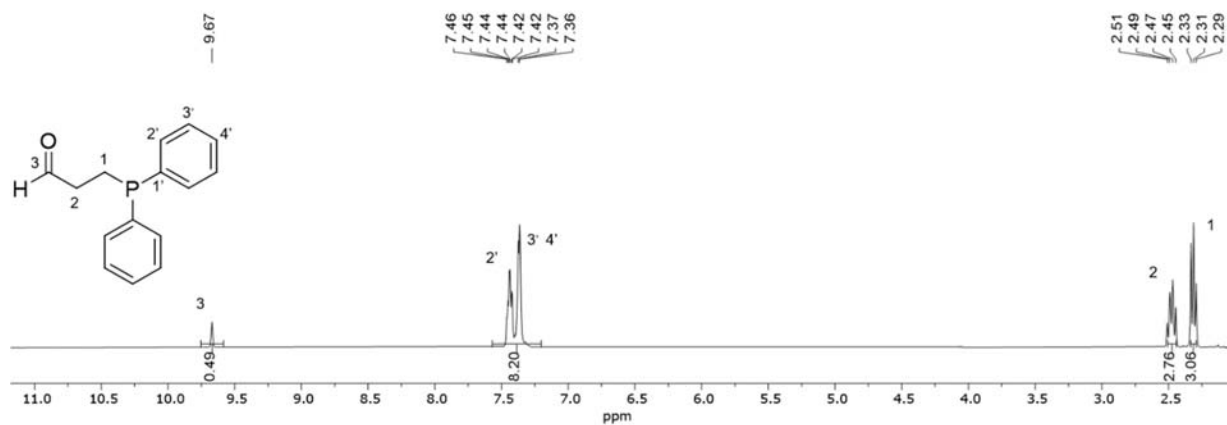

Figure S1. <sup>1</sup>H NMR spectrum of **PCHO** in CD<sub>3</sub>CN at 25 °C.

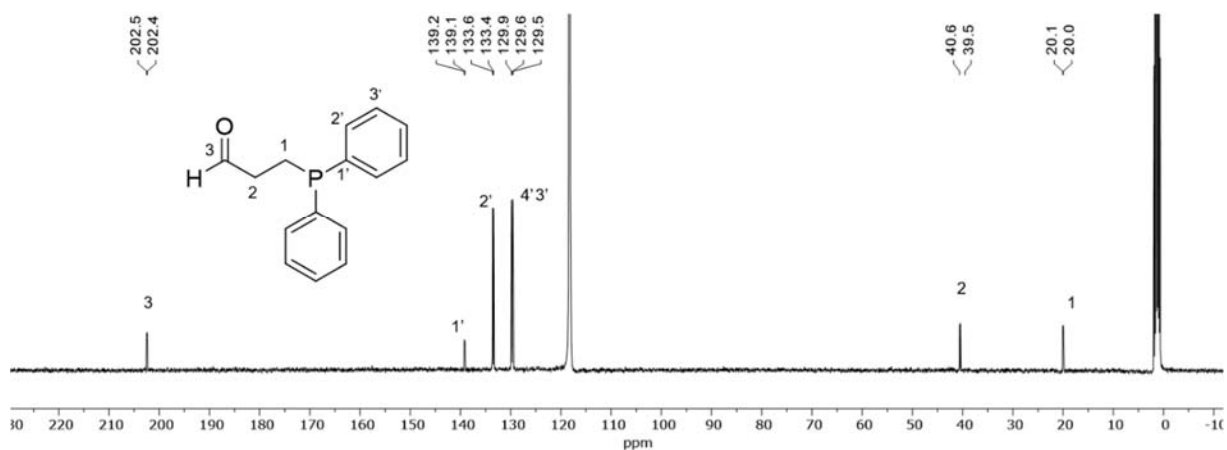

Figure S2. <sup>13</sup>C{<sup>1</sup>H} NMR spectrum of **PCHO** in CD<sub>3</sub>CN at 25 °C.

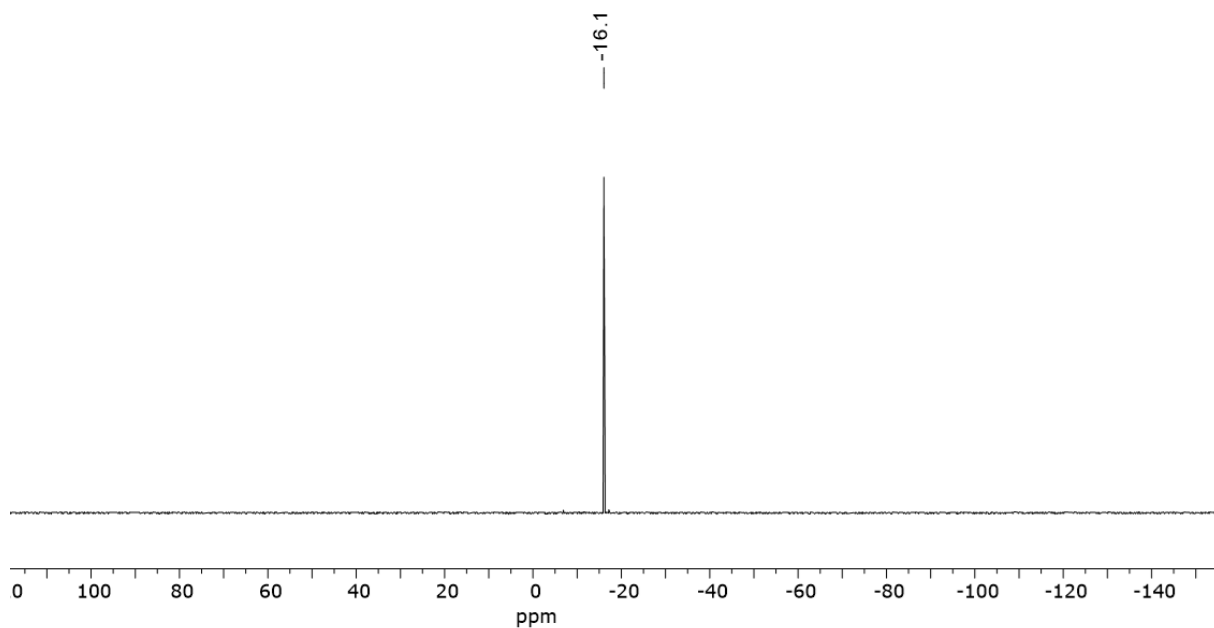

Figure S3.  $^{31}\text{P}\{^1\text{H}\}$  NMR spectrum of **PCHO** in  $\text{CD}_3\text{CN}$  at 25 °C.

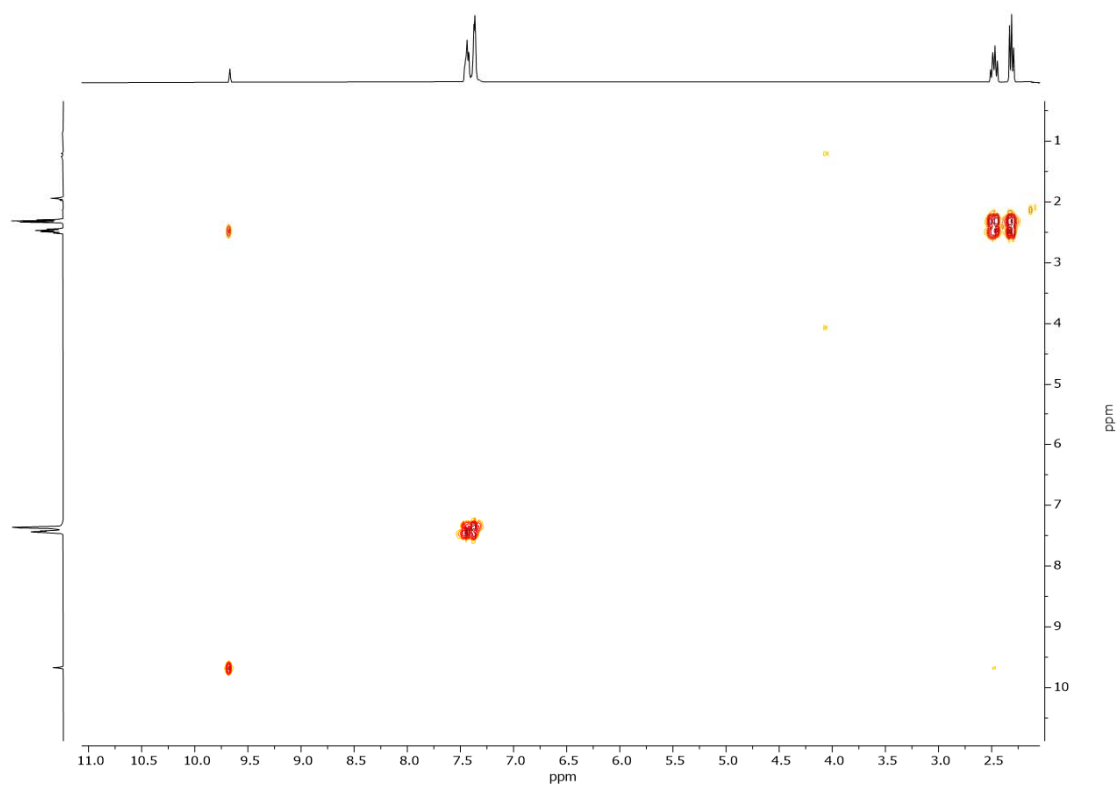

Figure S4.  $^1\text{H}$ - $^1\text{H}$  COSY spectrum of **PCHO** in  $\text{CD}_3\text{CN}$  at 25 °C.

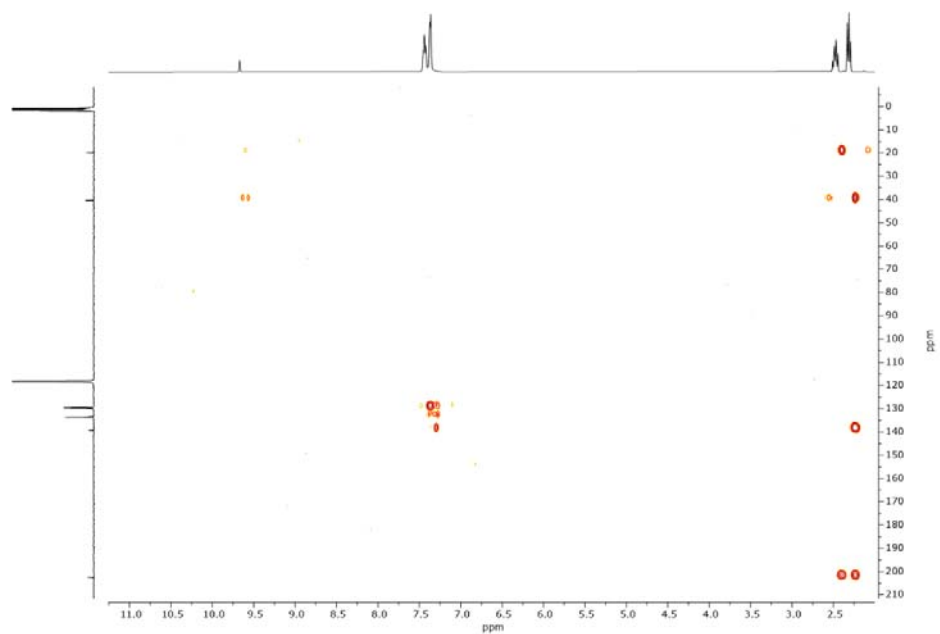

Figure S5.  $^1\text{H}$ - $^{13}\text{C}$  HMBC spectrum of **PCHO** in  $\text{CD}_3\text{CN}$  at 25  $^\circ\text{C}$ .

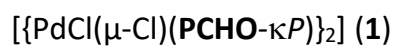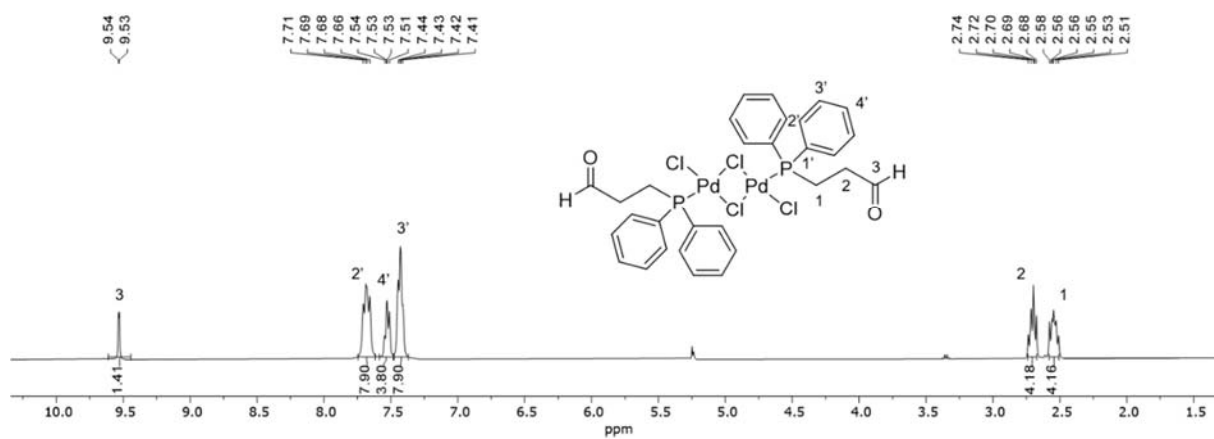

Figure S6.  $^1\text{H}$  NMR spectrum of  $\mathbf{1}$  in  $\text{CD}_2\text{Cl}_2$  at  $25\text{ }^\circ\text{C}$ .

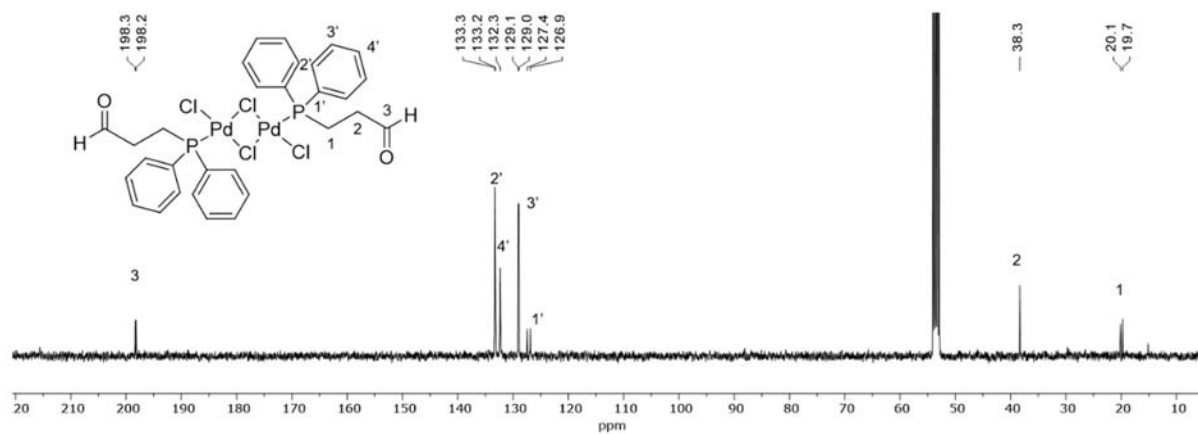

Figure S7.  $^{13}\text{C}\{^1\text{H}\}$  NMR spectrum of  $\mathbf{1}$  in  $\text{CD}_2\text{Cl}_2$  at  $25\text{ }^\circ\text{C}$ .

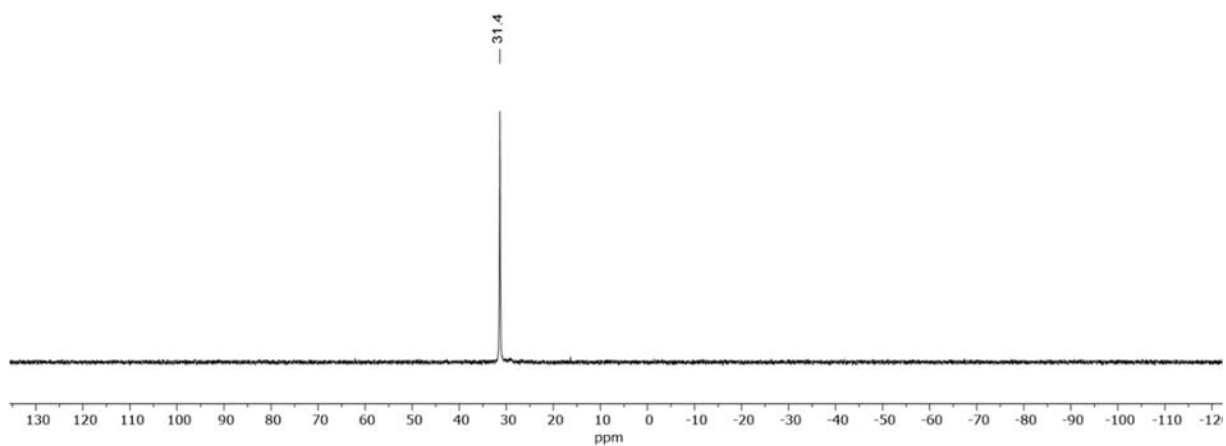

Figure S8.  $^{31}\text{P}\{^1\text{H}\}$  NMR spectrum of **1** in  $\text{CD}_2\text{Cl}_2$  at 25 °C.

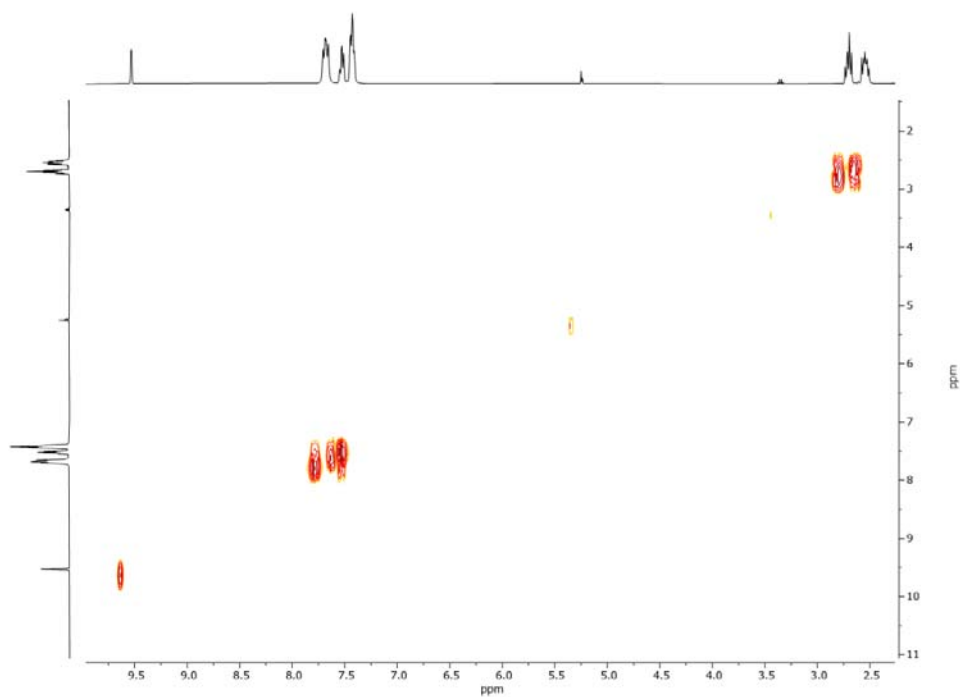

Figure S9.  $^1\text{H}$ - $^1\text{H}$  COSY spectrum of **1** in  $\text{CD}_2\text{Cl}_2$  at 25 °C.

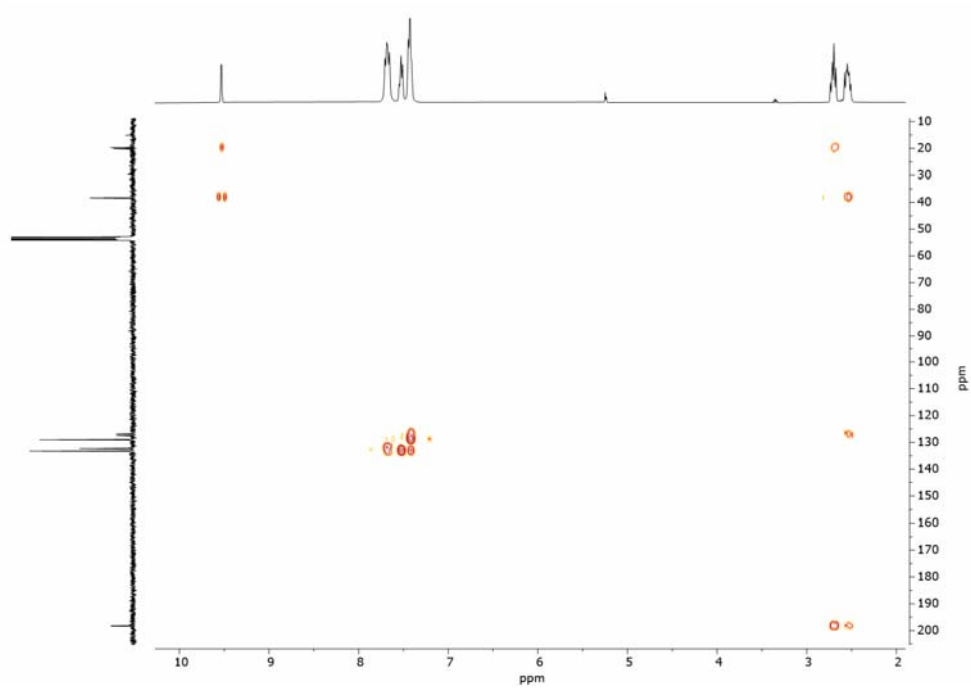

Figure S10.  $^1\text{H}$ - $^{13}\text{C}$  HMBC spectrum of **1** in  $\text{CD}_2\text{Cl}_2$  at 25 °C.

*trans*-[PdCl<sub>2</sub>(PCHO-κP)<sub>2</sub>] (**2**)

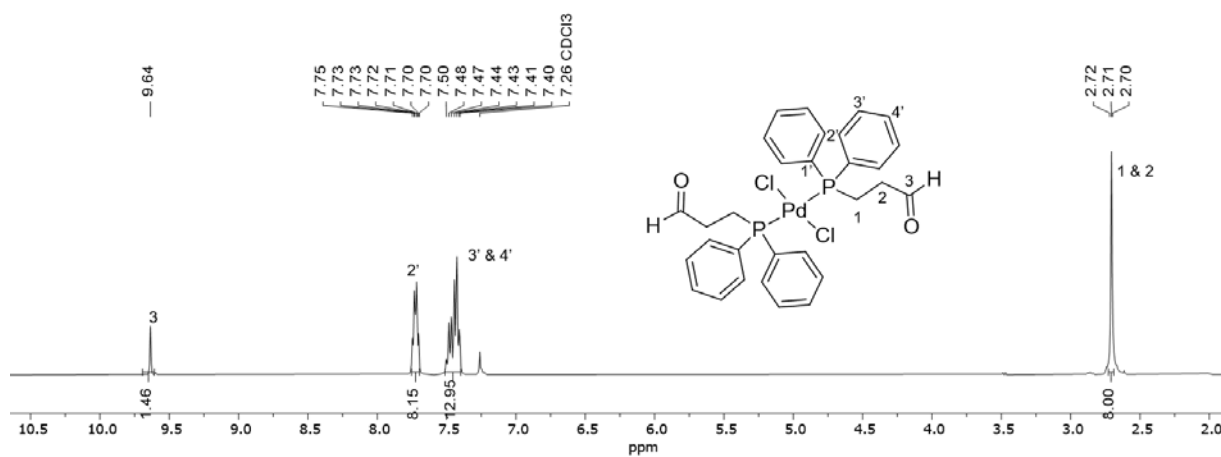

Figure S11. <sup>1</sup>H NMR spectrum of **2** in CDCl<sub>3</sub> at 25 °C.

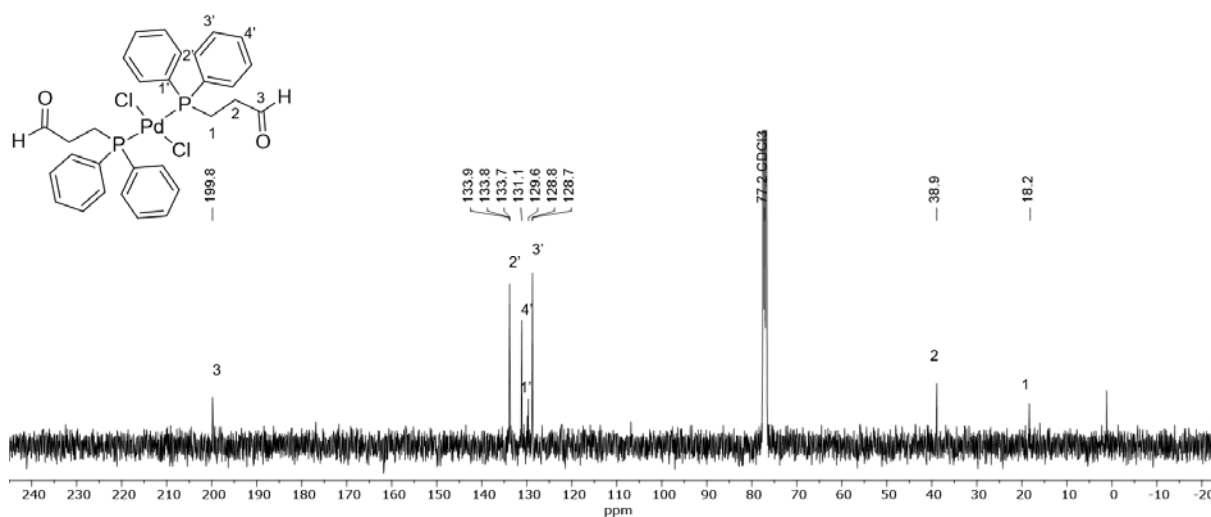

Figure S12. <sup>13</sup>C{<sup>1</sup>H} NMR spectrum of **2** in CDCl<sub>3</sub> at 25 °C.



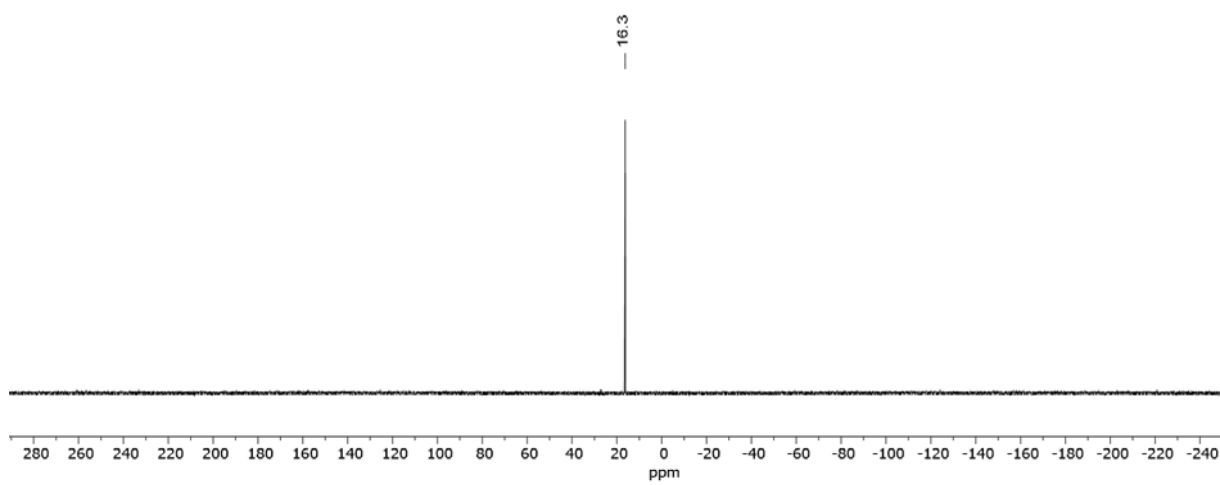

Figure S13.  $^{31}\text{P}\{^1\text{H}\}$  NMR spectrum of **2** in  $\text{CDCl}_3$  at 25 °C

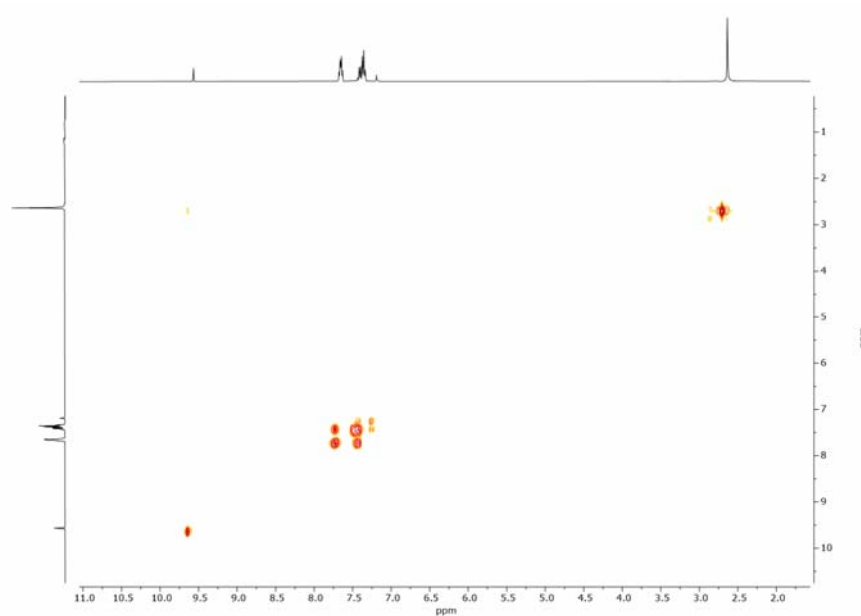

Figure S14.  $^1\text{H}$ - $^1\text{H}$  COSY spectrum of **2** in  $\text{CDCl}_3$  at 25 °C.

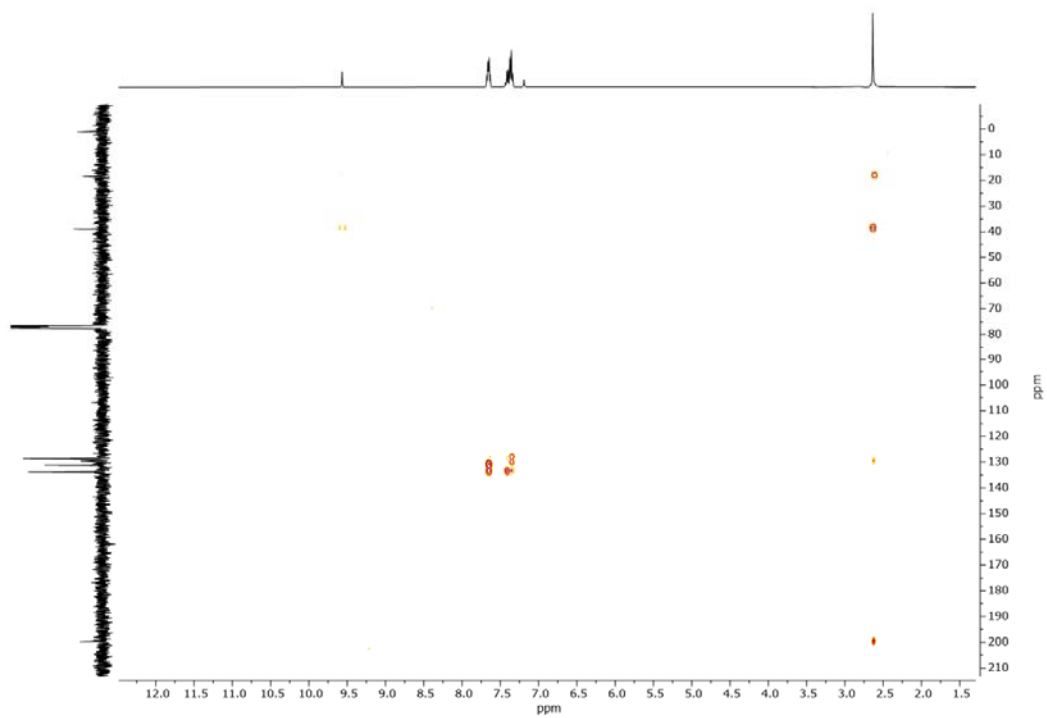

Figure S15.  $^1\text{H}$ - $^{13}\text{C}$  HMBC spectrum of **2** in  $\text{CDCl}_3$  at 25 °C.

*trans*-[PtCl<sub>2</sub>(PCHO-κP)<sub>2</sub>] (**3**)

<sup>1</sup>H NMR (400 MHz, CDCl<sub>3</sub>) δ (ppm) = 9.65 – 9.64 (m, 1H), 7.77 – 7.72 (m, 4H), 7.50 – 7.71 (m, 6H), 2.80 – 2.72 (m, 4H). <sup>13</sup>C{<sup>1</sup>H} NMR (101 MHz, CDCl<sub>3</sub>) δ (ppm) = 199.9 – 199.8 (m, C3), 133.9 – 133.7 (m, C2'), 131.1 (C4'), 129.5 – 129.2 (C1'), 128.7 – 128.6 (m, C2'), 38.7 (C2), 17.0 (C1). <sup>31</sup>P{<sup>1</sup>H} NMR (162 MHz, CDCl<sub>3</sub>) δ (ppm) = 12.4 (s + Pt satellites, <sup>1</sup>J<sub>P,Pt</sub> = 2564 Hz).

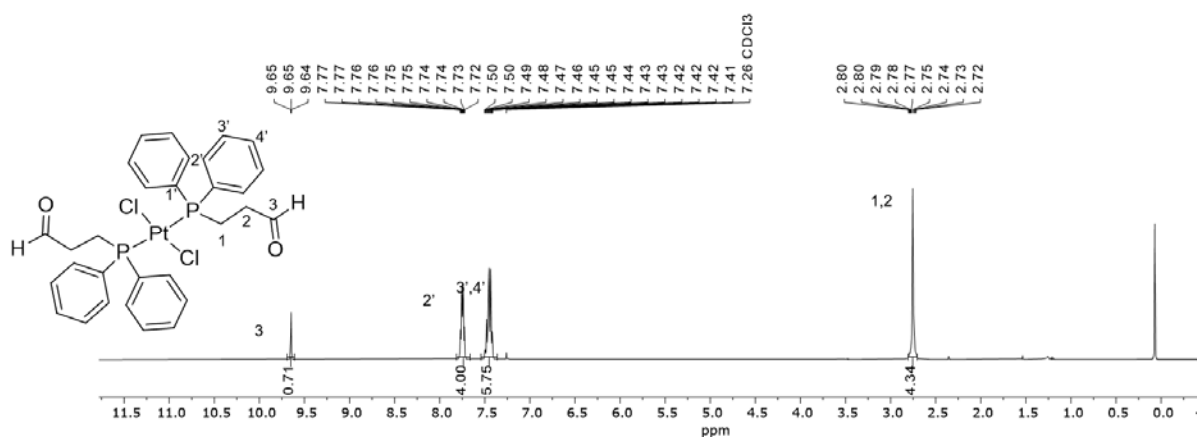

Figure S16. <sup>1</sup>H NMR spectrum of **3** in CDCl<sub>3</sub> at 25 °C.

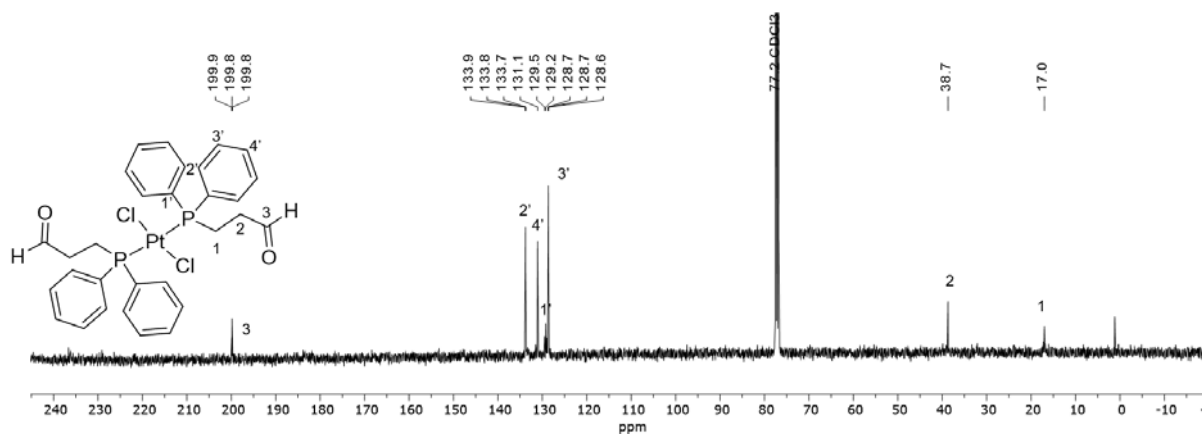

Figure S17. <sup>13</sup>C{<sup>1</sup>H} NMR spectrum of **3** in CDCl<sub>3</sub> at 25 °C.

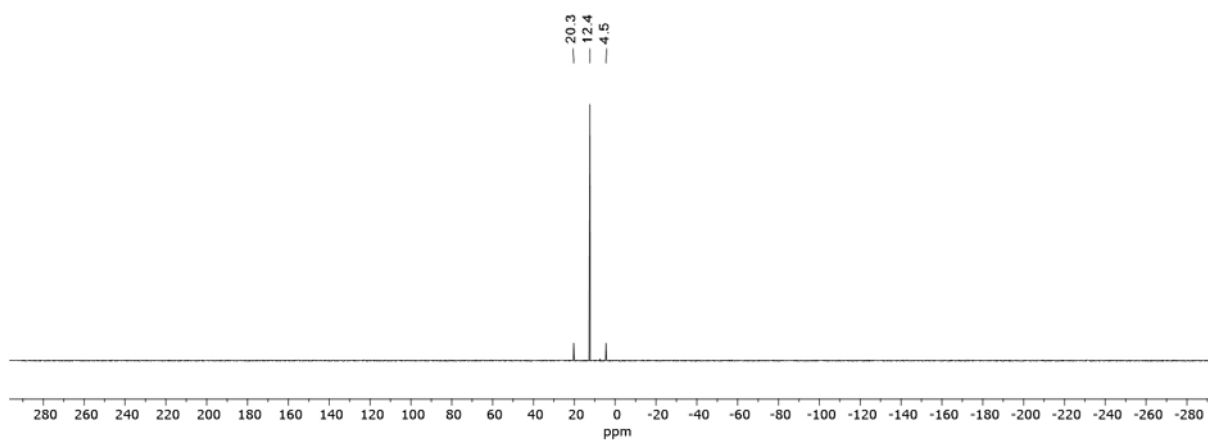

Figure S18.  $^{31}\text{P}\{^1\text{H}\}$  NMR spectrum of **3** in  $\text{CDCl}_3$  at 25 °C.

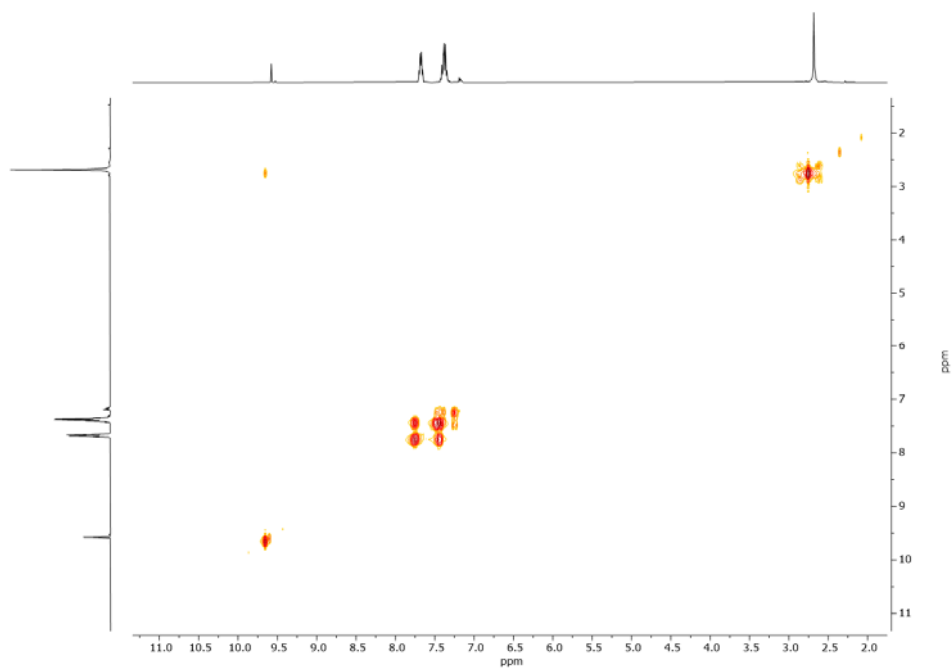

Figure S19.  $^1\text{H}$ - $^1\text{H}$  COSY spectrum of **3** in  $\text{CDCl}_3$  at 25 °C.

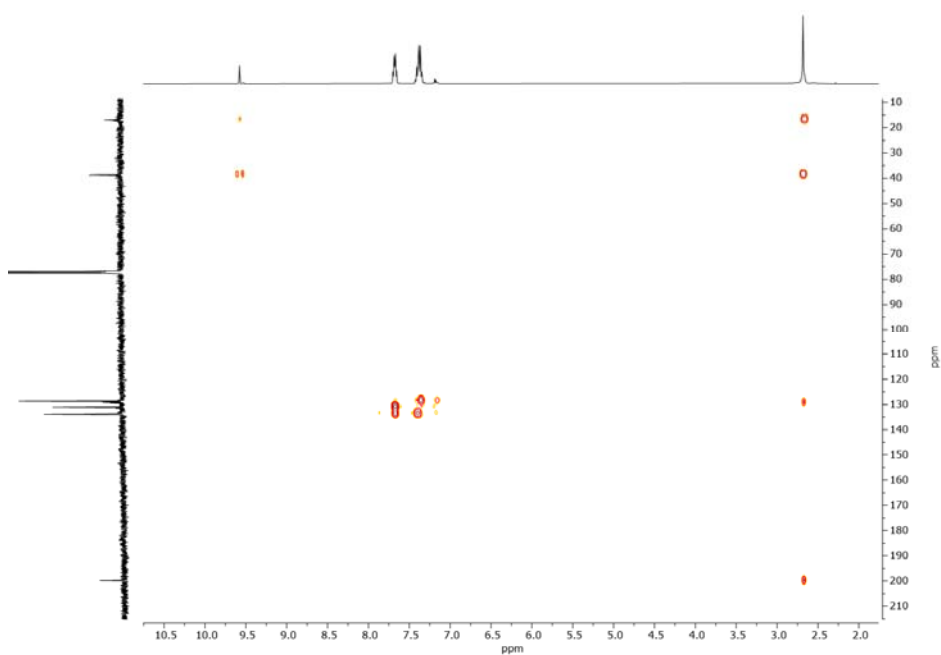

Figure S20.  $^1\text{H}$ - $^{13}\text{C}$  HMBC spectrum of **3** in  $\text{CDCl}_3$  at 25 °C.

*cis*-[PtCl<sub>2</sub>(PCHO-κP)<sub>2</sub>] (**4**)

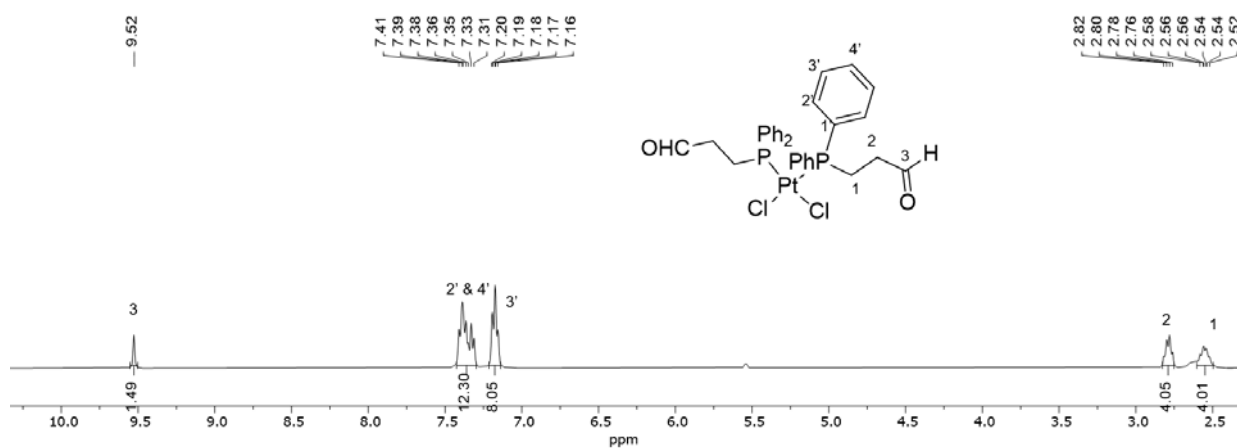

Figure S21. <sup>1</sup>H NMR spectrum of **4** in CDCl<sub>3</sub> at 25 °C.

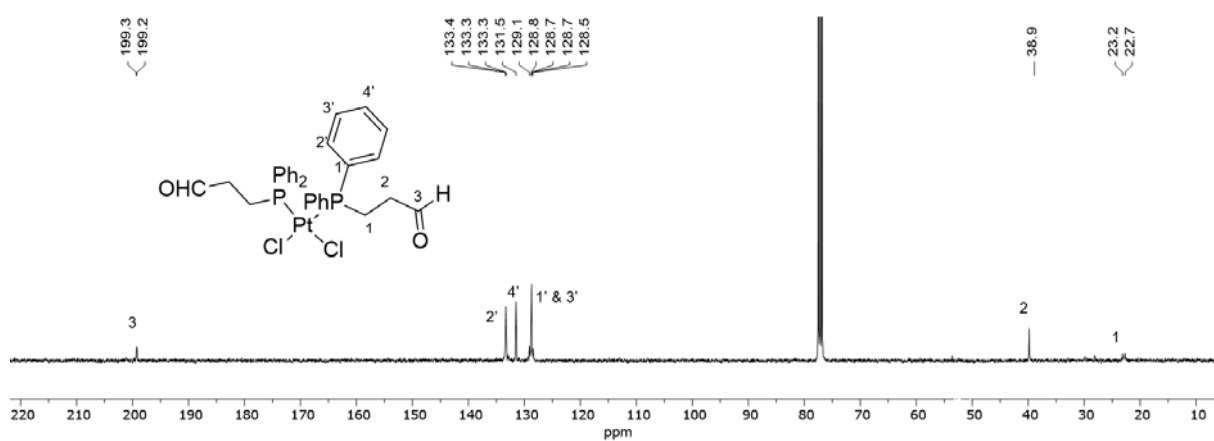

Figure S22. <sup>13</sup>C{<sup>1</sup>H} NMR spectrum of **4** in CDCl<sub>3</sub> at 25 °C.

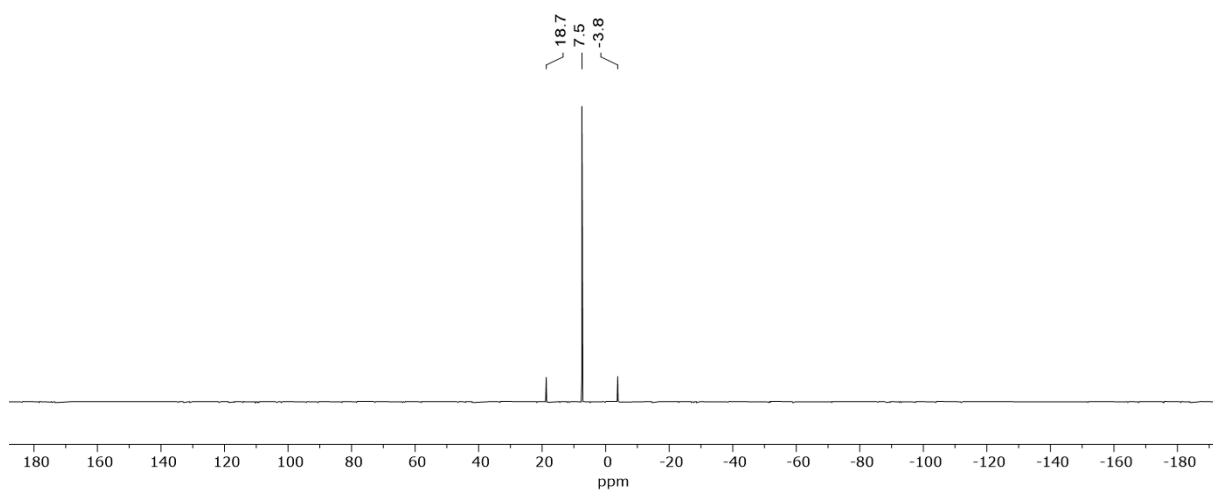

Figure S23.  $^{31}\text{P}\{^1\text{H}\}$  NMR spectrum of **4** in  $\text{CDCl}_3$  at 25 °C.

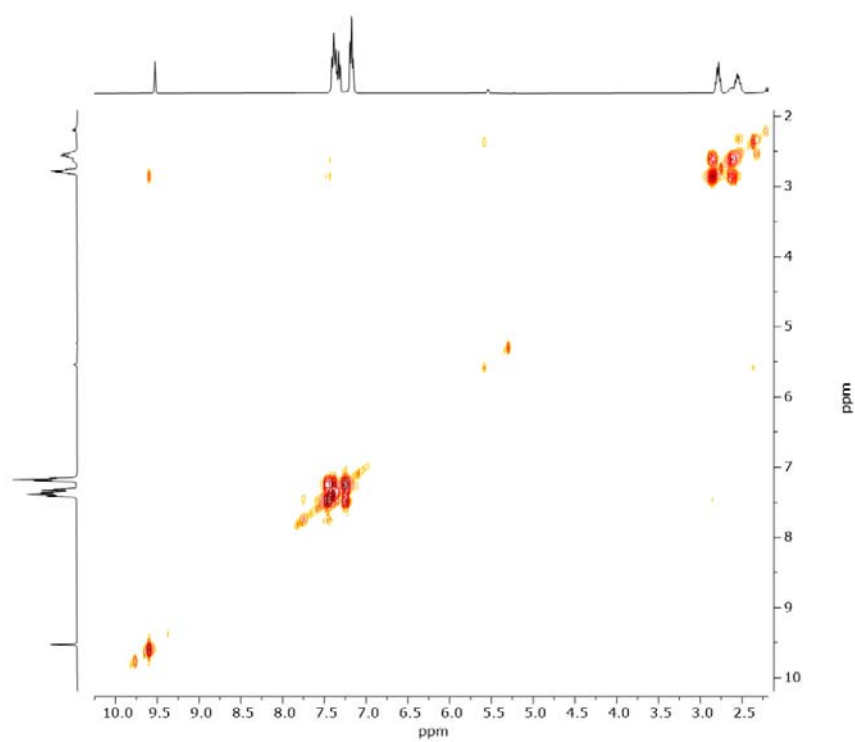

Figure S24.  $^1\text{H}$ - $^1\text{H}$  COSY spectrum of **4** in  $\text{CDCl}_3$  at 25 °C.

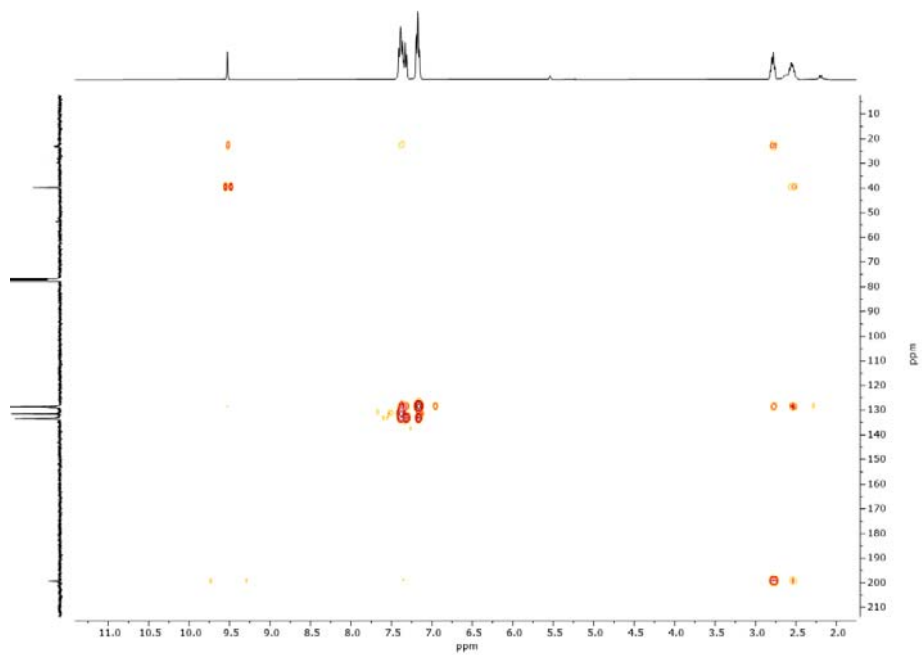

Figure S25.  $^1\text{H}$ - $^{13}\text{C}$  HMBC spectrum of **4** in  $\text{CDCl}_3$  at 25 °C.



## 2. X-Ray Diffraction Analyses

Table S1. Data collection and structure refinement data of complexes **1-4**.

| Compound                                                 | <b>1</b>                                                                                      | <b>2</b>                                                                         | <b>3</b>                                                                         | <b>4</b>                                                                         |
|----------------------------------------------------------|-----------------------------------------------------------------------------------------------|----------------------------------------------------------------------------------|----------------------------------------------------------------------------------|----------------------------------------------------------------------------------|
| Empirical formula                                        | C <sub>30</sub> H <sub>30</sub> Cl <sub>4</sub> O <sub>2</sub> P <sub>2</sub> Pd <sub>2</sub> | C <sub>30</sub> H <sub>30</sub> Cl <sub>2</sub> O <sub>2</sub> P <sub>2</sub> Pd | C <sub>30</sub> H <sub>30</sub> Cl <sub>2</sub> O <sub>2</sub> P <sub>2</sub> Pt | C <sub>30</sub> H <sub>30</sub> Cl <sub>2</sub> O <sub>2</sub> P <sub>2</sub> Pt |
| Formula weight                                           | 839.08                                                                                        | 661.78                                                                           | 750.47                                                                           | 750.47                                                                           |
| Temperature [K]                                          | 130(2)                                                                                        | 130(2)                                                                           | 130(2)                                                                           | 130(2)                                                                           |
| Crystal system                                           | Monoclinic                                                                                    | Triclinic                                                                        | Triclinic                                                                        | Orthorhombic                                                                     |
| Space group                                              | <i>P</i> 2 <sub>1</sub> / <i>c</i>                                                            | <i>P</i> $\bar{1}$                                                               | <i>P</i> $\bar{1}$                                                               | <i>Pbca</i>                                                                      |
| Unit cell dimensions                                     |                                                                                               |                                                                                  |                                                                                  |                                                                                  |
| a [pm]                                                   | 731.84(1)                                                                                     | 737.86(3)                                                                        | 736.69(2)                                                                        | 1819.64(3)                                                                       |
| b [pm]                                                   | 1225.50(2)                                                                                    | 1012.92(2)                                                                       | 1015.36(2)                                                                       | 1724.11(3)                                                                       |
| c [pm]                                                   | 1768.33(3)                                                                                    | 1045.43(3)                                                                       | 1042.53(3)                                                                       | 3613.85(6)                                                                       |
| $\alpha$ [deg]                                           | 90                                                                                            | 104.828(2)                                                                       | 104.886(2)                                                                       | 90                                                                               |
| $\beta$ [deg]                                            | 90.789(1)                                                                                     | 104.879(3)                                                                       | 104.784(2)                                                                       | 90                                                                               |
| $\gamma$ [deg]                                           | 90                                                                                            | 96.825(2)                                                                        | 96.938(2)                                                                        | 90                                                                               |
| Volume [nm <sup>3</sup> ]                                | 1.58581(4)                                                                                    | 0.71562(4)                                                                       | 0.71406(3)                                                                       | 11.3376(3)                                                                       |
| Z                                                        | 2                                                                                             | 1                                                                                | 1                                                                                | 16                                                                               |
| $\rho$ (calc.) [Mg/m <sup>3</sup> ]                      | 1.757                                                                                         | 1.536                                                                            | 1.745                                                                            | 1.759                                                                            |
| $\mu$ [mm <sup>-1</sup> ]                                | 1.599                                                                                         | 0.973                                                                            | 5.238                                                                            | 5.279                                                                            |
| F(000)                                                   | 832                                                                                           | 336                                                                              | 368                                                                              | 5888                                                                             |
| Crystal size [mm <sup>3</sup> ]                          | 0.40 · 0.20 · 0.20                                                                            | 0.40 · 0.30 · 0.20                                                               | 0.15 · 0.10 · 0.04                                                               | 0.70 · 0.05 · 0.01                                                               |
| $\Theta_{\min}$ - $\Theta_{\max}$ [deg]                  | 2.022 / 35.771                                                                                | 2.112 / 34.755                                                                   | 2.118 / 32.467                                                                   | 1.979 / 27.099                                                                   |
| Index ranges                                             | -11 ≤ h ≤ 11<br>-19 ≤ k ≤ 20<br>-28 ≤ l ≤ 28                                                  | -11 ≤ h ≤ 11<br>-16 ≤ k ≤ 15<br>-16 ≤ l ≤ 15                                     | -11 ≤ h ≤ 10<br>-15 ≤ k ≤ 15<br>-15 ≤ l ≤ 15                                     | -22 ≤ h ≤ 21<br>-20 ≤ k ≤ 22<br>-45 ≤ l ≤ 44                                     |
| Reflections collected                                    | 30772                                                                                         | 17006                                                                            | 16489                                                                            | 100227                                                                           |
| Independent reflections<br>[ <i>R</i> <sub>(int)</sub> ] | 7047 [0.0375]                                                                                 | 5761 [0.0244]                                                                    | 4762 [0.0573]                                                                    | 11678 [0.0700]                                                                   |
| Completeness ( $\Theta$ [deg])                           | 100.0 % (34.34)                                                                               | 100.0 % (33.14)                                                                  | 100.0 % (30.51)                                                                  | 100.0 % (25.350)                                                                 |
| <i>T</i> <sub>Min</sub> / <i>T</i> <sub>Max</sub>        | 1.00000 / 0.89776                                                                             | 1.00000 / 0.99129                                                                | 1.00000 / 0.94180                                                                | 1.00000 / 0.69745                                                                |
| Restraints/parameters                                    | 0 / 181                                                                                       | 0 / 229                                                                          | 0 / 229                                                                          | 0 / 667                                                                          |
| Goof [on F <sup>2</sup> ]                                | 1.072                                                                                         | 1.053                                                                            | 1.025                                                                            | 1.100                                                                            |
| R1 / wR2 [ <i>I</i> > 2σ( <i>I</i> )]                    | 0.0343 / 0.0795                                                                               | 0.0258 / 0.0587                                                                  | 0.0294 / 0.0632                                                                  | 0.0384 / 0.0733                                                                  |
| R1 / wR2 (all data)                                      | 0.0429 / 0.0854                                                                               | 0.0291 / 0.0605                                                                  | 0.0296 / 0.0635                                                                  | 0.0520 / 0.0779                                                                  |
| Residual electron density<br>[e·Å <sup>-3</sup> ]        | 1.251 / -1.253                                                                                | 0.574 / -0.891                                                                   | 2.252 / -1.998                                                                   | 0.974 / -1.445                                                                   |
| Comments                                                 | -                                                                                             | compounds <b>2</b> and <b>3</b> are isotypic                                     |                                                                                  |                                                                                  |
| CCDC deposition number                                   | 2233898                                                                                       | 2233899                                                                          | 2233900                                                                          | 2240480                                                                          |

CCDC deposition numbers given in Table S1 contain the supplementary crystallographic data for this paper. These data can be obtained free of charge via <https://summary.ccdc.cam.ac.uk/structure-summary-form> (or from the Cambridge Crystallographic Data Centre, 12 Union Road, Cambridge CB2 1EZ, UK; fax: (+44)1223-336-033; or deposit@ccdc.cam.ac.uk).

## Molecular structures

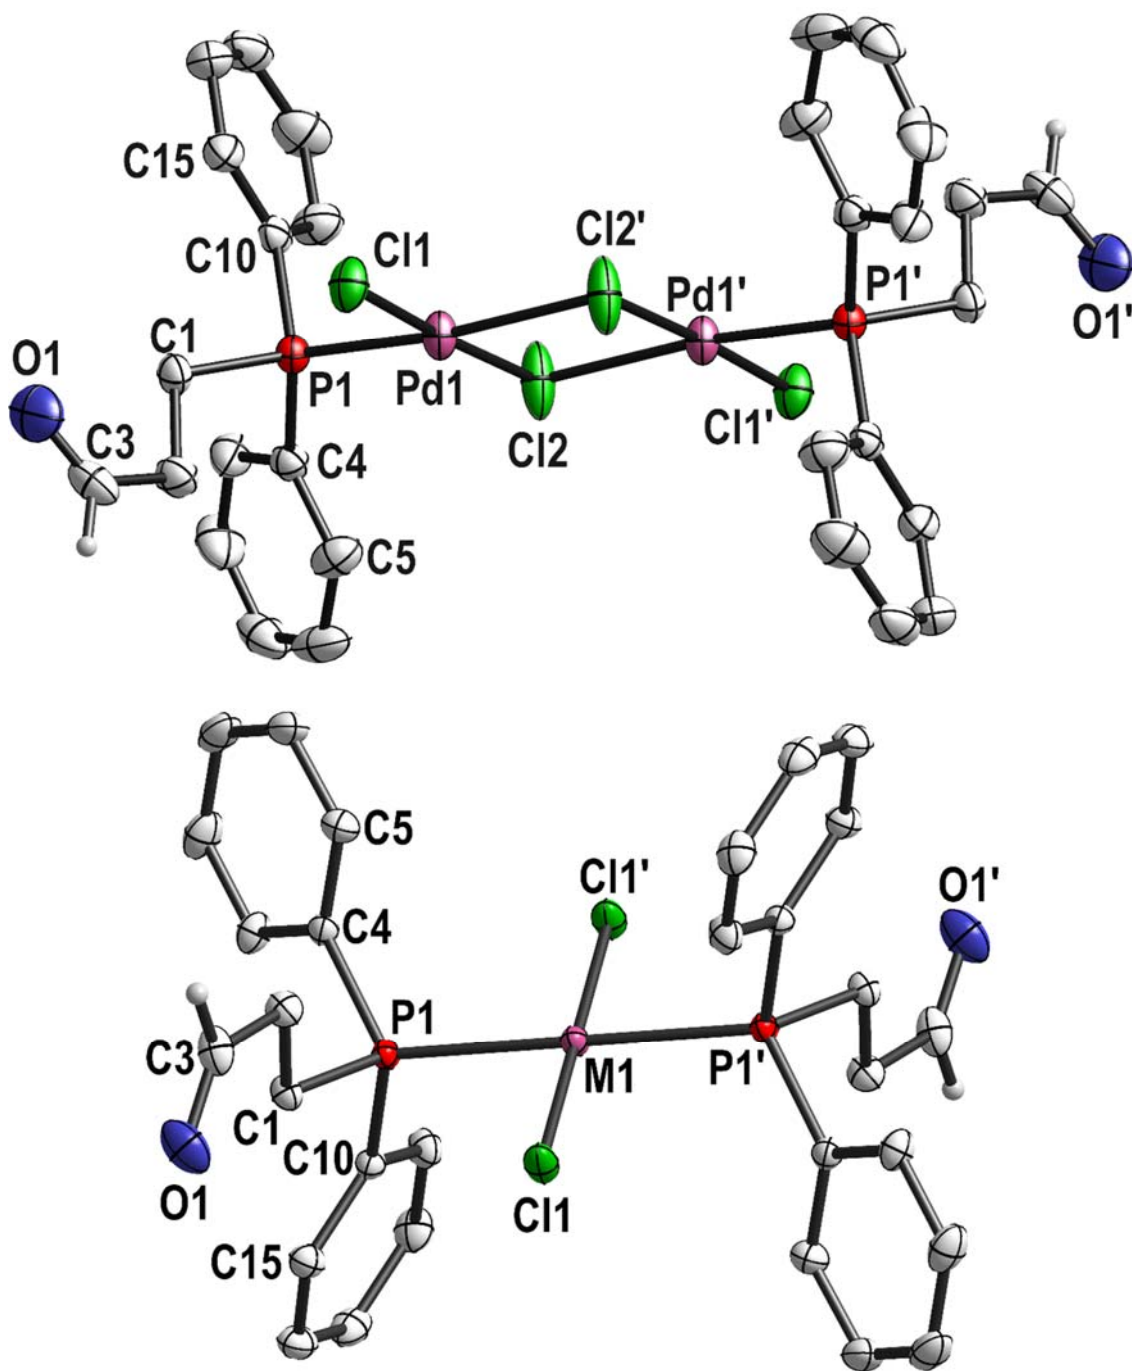

Figure S26-a. Molecular structures and labelling schemes of  $trans\text{-}[\text{PdCl}(\mu\text{-Cl})(\text{PCHO-}\kappa\text{P})_2]$  (**1**; top) and  $trans\text{-}[\text{MCl}_2(\text{PCHO-}\kappa\text{P})_2]$  (**2** and **3**; M = Pd, Pt; bottom). Hydrogen atoms, except CHO, are omitted for clarity; displacement ellipsoids are set at the 50% probability level.

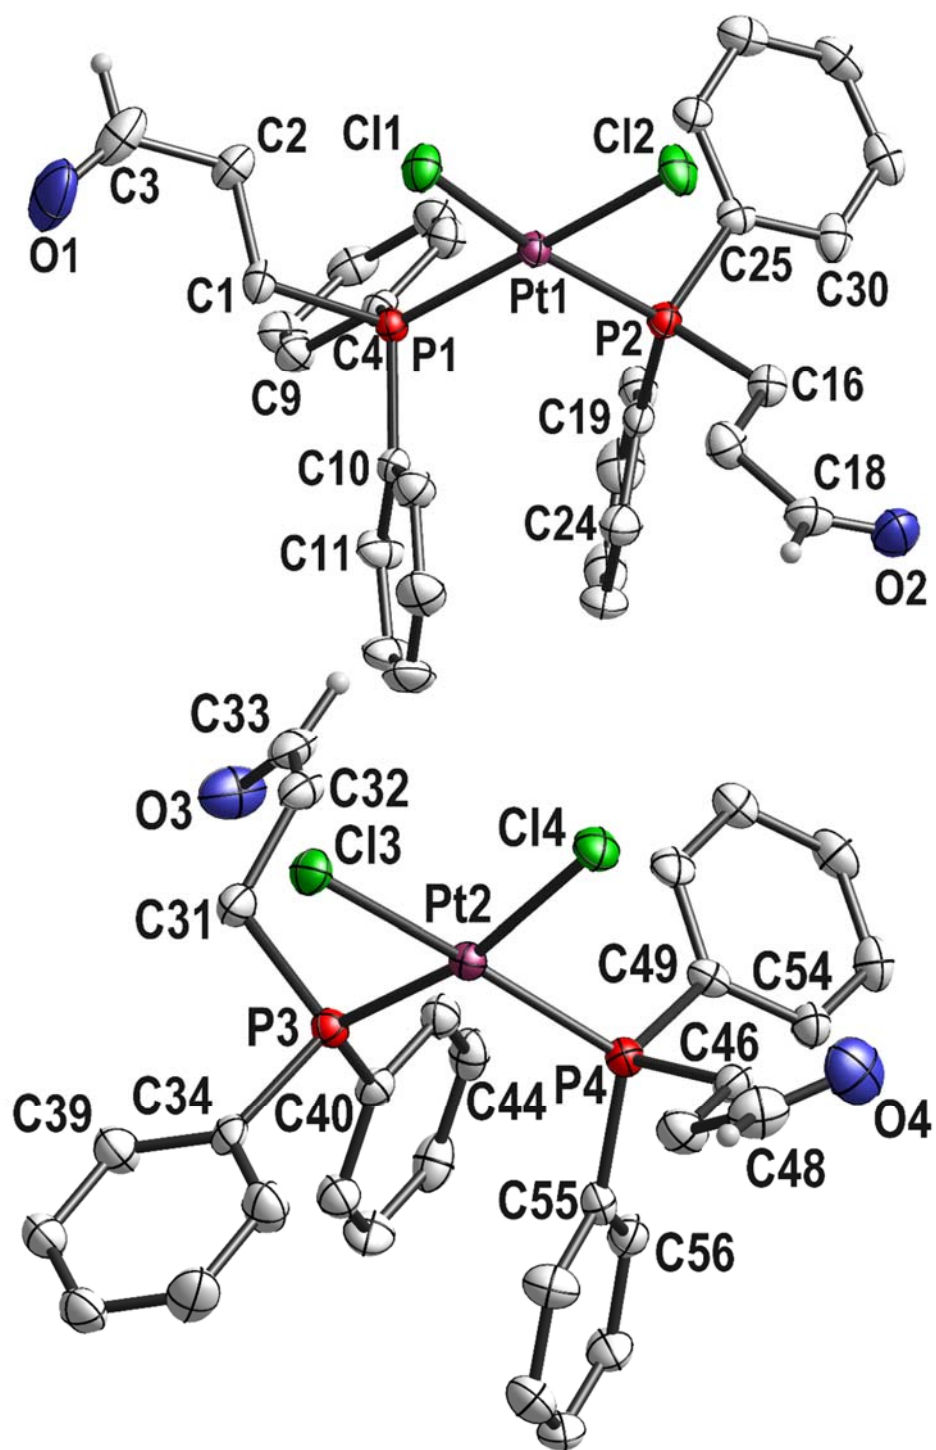

Figure S26-b. Molecular structures and labelling schemes of *cis*-[PtCl<sub>2</sub>(PCHO- $\kappa$ P)<sub>2</sub>] (**4**). Hydrogen atoms, except CHO, are omitted for clarity; displacement ellipsoids are set at the 50% probability level; two independent molecules in the asymmetric unit.

### Selected bond lengths and bond angles

Table S2. Selected Bond Lengths [pm] and Angles [°] for *trans*-[PdCl( $\mu$ -Cl)(PCHO- $\kappa$ P)]<sub>2</sub> (**1**).

|                    |           |
|--------------------|-----------|
| Pd(1)-P(1)         | 221.80(4) |
| Pd(1)-Cl(1)        | 228.23(5) |
| Pd(1)-Cl(2)        | 232.21(5) |
| Pd(1)-Cl(2')       | 243.15(5) |
| P(1)-C(10)         | 180.8(2)  |
| P(1)-C(4)          | 181.3(2)  |
| P(1)-C(1)          | 182.3(2)  |
| O(1)-C(3)          | 119.3(3)  |
|                    |           |
| P(1)-Pd(1)-Cl(1)   | 90.55(2)  |
| P(1)-Pd(1)-Cl(2)   | 91.38(2)  |
| Cl(1)-Pd(1)-Cl(2)  | 177.26(2) |
| P(1)-Pd(1)-Cl(2')  | 172.48(2) |
| Cl(1)-Pd(1)-Cl(2') | 91.39(2)  |
| Cl(2)-Pd(1)-Cl(2') | 86.45(2)  |
| Pd(1)-Cl(2)-Pd(1') | 93.55(2)  |
| C(10)-P(1)-C(4)    | 108.10(8) |
| C(10)-P(1)-C(1)    | 107.10(8) |
| C(4)-P(1)-C(1)     | 102.63(8) |
| C(10)-P(1)-Pd(1)   | 105.98(6) |
| C(4)-P(1)-Pd(1)    | 115.55(6) |
| C(1)-P(1)-Pd(1)    | 117.01(6) |
| C(2)-C(1)-P(1)     | 111.7(1)  |

Table S3. Selected Bond Lengths [pm] and Angles [°] for *trans*-[PdCl<sub>2</sub>(PCHO-κP)<sub>2</sub>] (**2**).

|                    |           |
|--------------------|-----------|
| Pd(1)-Cl(1)        | 229.95(3) |
| Pd(1)-P(1)         | 233.21(3) |
| P(1)-C(10)         | 181.2(1)  |
| P(1)-C(4)          | 181.7(1)  |
| P(1)-C(1)          | 182.7(1)  |
| O(1)-C(3)          | 119.9(2)  |
| Cl(1)-Pd(1)-Cl(1') | 180.00(2) |
| Cl(1)-Pd(1)-P(1')  | 89.84(1)  |
| Cl(1)-Pd(1)-P(1)   | 90.16(1)  |
| Cl(1')-Pd(1)-P(1)  | 89.84(1)  |
| P(1')-Pd(1)-P(1)   | 180.0     |
| C(10)-P(1)-C(4)    | 105.08(6) |
| C(10)-P(1)-C(1)    | 105.13(6) |
| C(4)-P(1)-C(1)     | 103.44(6) |
| C(10)-P(1)-Pd(1)   | 109.83(4) |
| C(4)-P(1)-Pd(1)    | 116.62(4) |
| C(1)-P(1)-Pd(1)    | 115.62(4) |
| C(2)-C(1)-P(1)     | 113.13(9) |
| C(2)-C(1)-H(1A)    | 111.(1)   |
| P(1)-C(1)-H(1A)    | 108(1)    |
| C(2)-C(1)-H(1B)    | 110(1)    |
| P(1)-C(1)-H(1B)    | 104(1)    |

Table S4. Selected Bond Lengths [pm] and Angles [°] for *trans*-[PtCl<sub>2</sub>(**PCHO-κP**)<sub>2</sub>] (**3**).

|               |           |
|---------------|-----------|
| Pt(1)-Cl(1)#1 | 230.71(7) |
| Pt(1)-Cl(1)   | 230.71(7) |
| Pt(1)-P(1)#1  | 231.61(7) |
| Pt(1)-P(1)    | 231.61(7) |
| P(1)-C(10)    | 181.2(3)  |
| P(1)-C(4)     | 181.5(3)  |
| P(1)-C(1)     | 182.3(3)  |
| O(1)-C(3)     | 119.8(4)  |

|                      |           |
|----------------------|-----------|
| Cl(1)#1-Pt(1)-Cl(1)  | 180.0     |
| Cl(1)#1-Pt(1)-P(1)#1 | 90.23(2)  |
| Cl(1)-Pt(1)-P(1)#1   | 89.77(2)  |
| Cl(1)#1-Pt(1)-P(1)   | 89.77(2)  |
| Cl(1)-Pt(1)-P(1)     | 90.23(2)  |
| P(1)#1-Pt(1)-P(1)    | 180.0     |
| C(10)-P(1)-C(4)      | 105.0(1)  |
| C(10)-P(1)-C(1)      | 105.0(1)  |
| C(4)-P(1)-C(1)       | 103.2(1)  |
| C(10)-P(1)-Pt(1)     | 110.84(9) |
| C(4)-P(1)-Pt(1)      | 116.07(9) |
| C(1)-P(1)-Pt(1)      | 115.54(9) |
| C(2)-C(1)-P(1)       | 113.1(2)  |
| C(2)-C(1)-H(1A)      | 109(2)    |
| P(1)-C(1)-H(1A)      | 106(2)    |
| C(2)-C(1)-H(1B)      | 108(2)    |
| P(1)-C(1)-H(1B)      | 107(2)    |

Table S5. Selected Bond Lengths [pm] and Angles [°] for *cis*-[PtCl<sub>2</sub>(**PCHO-κP**)<sub>2</sub>] (**4**).

|                   |           |
|-------------------|-----------|
| Pt(1)-P(1)        | 225.1(1)  |
| Pt(1)-P(2)        | 225.2(1)  |
| Pt(1)-Cl(1)       | 233.4(1)  |
| Pt(1)-Cl(2)       | 235.8(1)  |
| P(1)-C(4)         | 181.1(5)  |
| P(1)-C(10)        | 181.9(5)  |
| P(1)-C(1)         | 182.9(5)  |
| P(2)-C(25)        | 181.9(5)  |
| P(2)-C(19)        | 182.5(5)  |
| P(2)-C(16)        | 183.3(5)  |
| O(1)-C(3)         | 118.8(8)  |
| O(2)-C(18)        | 119.4(6)  |
| Pt(2)-P(3)        | 224.7(1)  |
| Pt(2)-P(4)        | 224.9(1)  |
| Pt(2)-Cl(3)       | 235.6(1)  |
| Pt(2)-Cl(4)       | 235.9(1)  |
| P(3)-C(34)        | 181.9(5)  |
| P(3)-C(40)        | 182.3(5)  |
| P(3)-C(31)        | 182.9(5)  |
| P(4)-C(49)        | 180.8(5)  |
| P(4)-C(55)        | 183.1(5)  |
| P(4)-C(46)        | 183.3(5)  |
| O(3)-C(33)        | 119.7(6)  |
| O(4)-C(48)        | 119.3(7)  |
|                   |           |
| P(1)-Pt(1)-P(2)   | 98.71(5)  |
| P(1)-Pt(1)-Cl(1)  | 90.22(5)  |
| P(2)-Pt(1)-Cl(1)  | 170.72(5) |
| P(1)-Pt(1)-Cl(2)  | 176.32(5) |
| P(2)-Pt(1)-Cl(2)  | 84.26(5)  |
| Cl(1)-Pt(1)-Cl(2) | 86.73(5)  |
| C(4)-P(1)-C(10)   | 110.7(2)  |
| C(4)-P(1)-C(1)    | 100.9(2)  |
| C(10)-P(1)-C(1)   | 103.1(2)  |

|                   |           |
|-------------------|-----------|
| C(4)-P(1)-Pt(1)   | 116.9(2)  |
| C(10)-P(1)-Pt(1)  | 107.3(2)  |
| C(1)-P(1)-Pt(1)   | 117.0(2)  |
| C(25)-P(2)-C(19)  | 103.0(2)  |
| C(25)-P(2)-C(16)  | 104.3(2)  |
| C(19)-P(2)-C(16)  | 102.3(2)  |
| C(25)-P(2)-Pt(1)  | 110.5(2)  |
| C(19)-P(2)-Pt(1)  | 123.1(2)  |
| C(16)-P(2)-Pt(1)  | 111.8(2)  |
| P(3)-Pt(2)-P(4)   | 99.66(5)  |
| P(3)-Pt(2)-Cl(3)  | 85.40(5)  |
| P(4)-Pt(2)-Cl(3)  | 171.44(5) |
| P(3)-Pt(2)-Cl(4)  | 167.30(5) |
| P(4)-Pt(2)-Cl(4)  | 88.31(5)  |
| Cl(3)-Pt(2)-Cl(4) | 87.97(5)  |
| C(34)-P(3)-C(40)  | 105.4(2)  |
| C(34)-P(3)-C(31)  | 104.7(2)  |
| C(40)-P(3)-C(31)  | 101.6(2)  |
| C(34)-P(3)-Pt(2)  | 115.7(2)  |
| C(40)-P(3)-Pt(2)  | 118.9(2)  |
| C(31)-P(3)-Pt(2)  | 108.8(2)  |
| C(49)-P(4)-C(55)  | 107.2(2)  |
| C(49)-P(4)-C(46)  | 102.2(2)  |
| C(55)-P(4)-C(46)  | 102.9(2)  |
| C(49)-P(4)-Pt(2)  | 115.0(2)  |
| C(55)-P(4)-Pt(2)  | 116.9(2)  |
| C(46)-P(4)-Pt(2)  | 111.2(2)  |



### 3. Isolation Experiments

#### Procedure for Sonogashira cross-coupling reaction

A mixture of bromobenzene (65.4  $\mu$ L, 0.625 mmol, 1.0 equiv.), phenylacetylene (75.5  $\mu$ L, 0.687 mmol, 1.1 equiv.), 1,8-diazabicyclo[5.4.0]undec-7-ene (DBU) (75.5  $\mu$ L, 0.781 mmol, 1.25 equiv.), **2** (20.6 mg, 0.031 mmol, 5 mol%) and dry degassed 1,4-dioxane (5.0 mL) was heated at 100 °C under a nitrogen atmosphere for 4h. The reaction mixture was passed over celite and washed with DCM (3 x 10 mL). The crude reaction mixture was purified using a Biotage Isolera (25 g SNAP Ultra cartridge, cyclohexane) to afford diphenylacetylene as a white solid (102.6 mg, 0.57 mmol, 92%).  $^1\text{H}$  NMR (400 MHz,  $\text{CDCl}_3$ )  $\delta$  7.59 – 7.52 (m, 4H), 7.41 – 7.33 (m, 6H);  $^{13}\text{C}\{^1\text{H}\}$  NMR (101 MHz,  $\text{CDCl}_3$ )  $\delta$  131.7, 128.5, 128.4, 123.4, 89.5. Data are in accordance with the literature.<sup>1</sup>

#### Procedure for Suzuki–Miyaura cross-coupling reaction

A mixture of bromobenzene (65.4  $\mu$ L, 0.625 mmol, 1.0 equiv.), *p*-tolylboronic acid (127.5 mg, 0.937 mmol, 1.5 equiv.), 1,1,3,3-tetramethylguanidine (TMG) (98.0  $\mu$ L, 0.781 mmol, 1.25 equiv.), **2** (20.6 mg, 0.031 mmol, 5 mol%) and dry degassed toluene (5.0 mL) was heated at 100 °C under a nitrogen atmosphere for 5 h. The reaction mixture was passed over celite and washed with DCM (3 x 10 mL). The crude reaction mixture was purified using a Biotage Isolera (25 g SNAP Ultra cartridge, *n*-hexane) to afford 4-methyl-1,1'-biphenyl as a white solid (83.0 mg, 0.49 mmol, 79%).  $^1\text{H}$  NMR (400 MHz,  $\text{CDCl}_3$ )  $\delta$  7.61 – 7.56 (m, 2H), 7.50 (d,  $J$  = 8.0 Hz, 2H), 7.43 (t,  $J$  = 7.6 Hz, 2H), 7.36 – 7.29 (m, 1H), 7.25 (d,  $J$  = 8.0 Hz, 2H), 2.40 (s, 3H);  $^{13}\text{C}\{^1\text{H}\}$  NMR (101 MHz,  $\text{CDCl}_3$ )  $\delta$  141.3, 138.5, 137.2, 129.6, 128.9, 127.1, 127.1, 127.1, 21.2. Data are in accordance with the literature.<sup>2</sup>

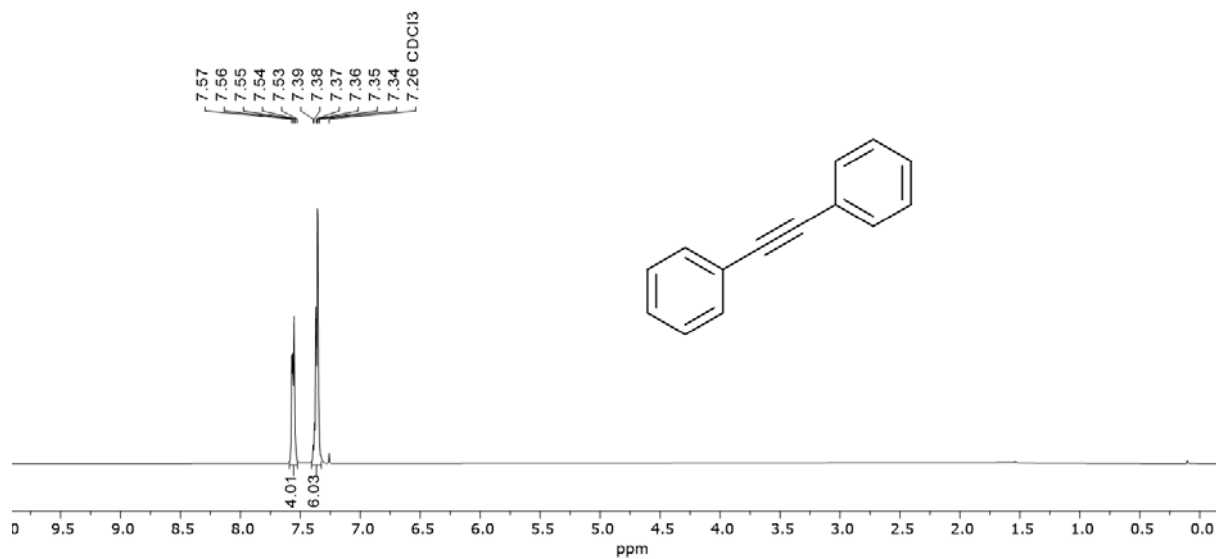

Figure S27. <sup>1</sup>H NMR spectrum of diphenylacetylene in CDCl<sub>3</sub> at 25 °C

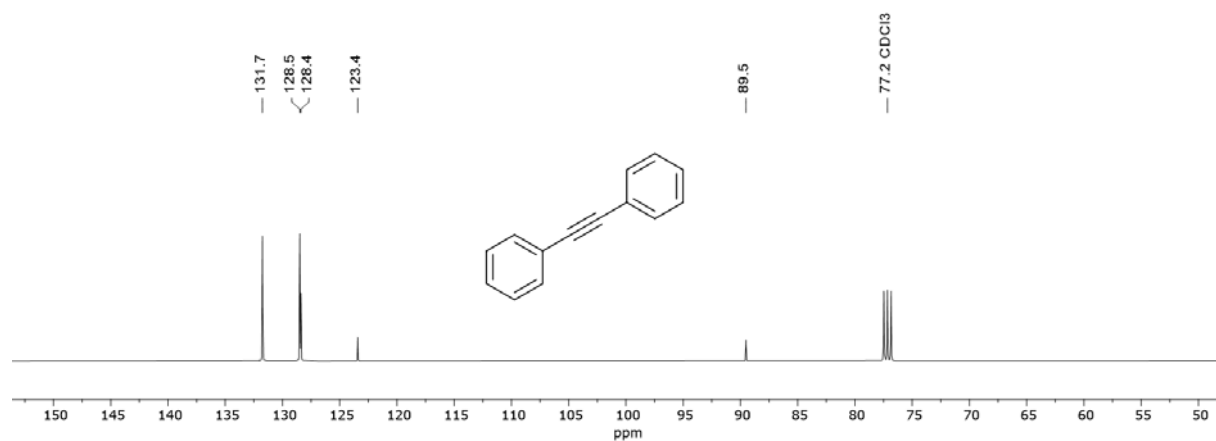

Figure S28. <sup>13</sup>C{<sup>1</sup>H} NMR spectrum of diphenylacetylene in CDCl<sub>3</sub> at 25 °C

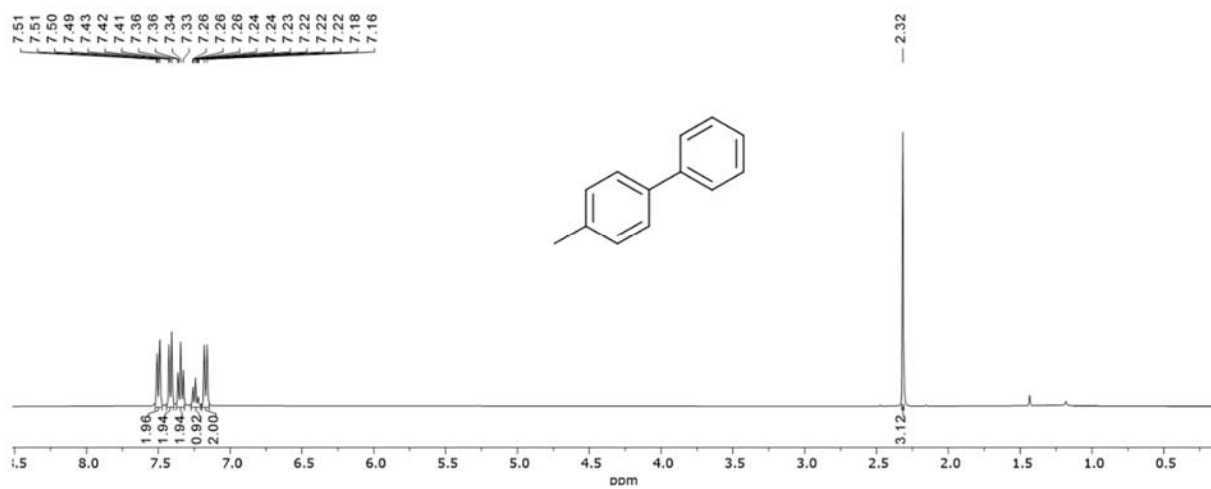

Figure S29. <sup>1</sup>H NMR spectrum of 4-methyl-1,1'-biphenyl in CDCl<sub>3</sub> at 25 °C

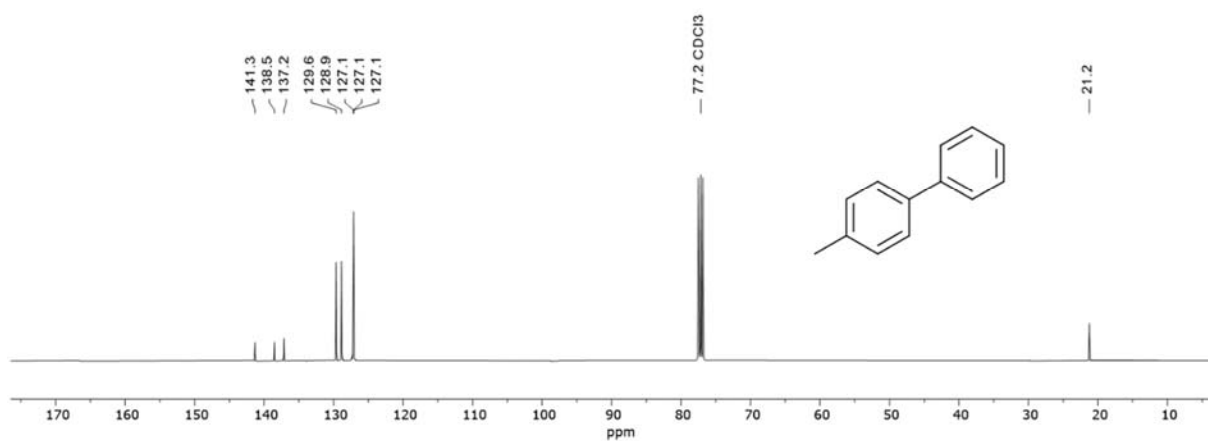

Figure S30. <sup>13</sup>C{<sup>1</sup>H} NMR spectrum of 4-methyl-1,1'-biphenyl in CDCl<sub>3</sub> at 25 °C

#### 4. Tests for the homogeneous/heterogeneous nature of the catalyst

To find out the nature of the catalyst, firstly a mercury test was performed. The addition of mercury led to a loss of catalytic activity. For the Sonogashira reaction, the yield of the reaction after the addition of mercury was 11% and for the Suzuki–Miyaura cross-coupling reaction 7%. This would imply that the reaction is catalysed by Pd nanoparticles which will form an amalgam with Hg and the catalysis will be inhibited. However, the reliability of the mercury test is questionable for complexes of the type  $[\text{PdCl}_2(\text{PR}_3)_2]$ .<sup>3</sup> Therefore, the stability of the pre-catalyst was studied by heating **2** with mercury in deuterated toluene. The  $^{31}\text{P}\{^1\text{H}\}$  NMR spectrum showed the formation of multiple products which implies that **2** is not stable in the presence of Hg and the test is a false positive (Figure S31).

Secondly, Crabtree's test<sup>4</sup> was performed for both reactions. Dibenzo[a,e]cyclooctatetraene (DCT) acts as a poison for homogeneous catalysts as it can act as a strong ligand. For Sonogashira and Suzuki–Miyaura cross-coupling reactions performed with the addition of DCT, yields of 57% and 75% were observed on completion. Though there is a loss of catalytic activity, the catalysis is not completely inhibited. It was found that **2** does not react with DCT at 100 °C in deuterated toluene, and therefore Crabtree's test is also not suitable (Figure S32).

Maitlis' test<sup>5</sup> was performed by passing the hot reaction mixture after half the completion time over a tightly packed column of celite. If the catalysis is heterogeneous, the Pd nanoparticles would stay on the column and the filtrate would be catalytically inactive. Therefore, fresh substrates and base were added to the clear yellow filtrate, and the reaction mixture was heated at 100 °C for 4 hours for the Sonogashira reaction and 5 hours for the Suzuki–Miyaura cross-coupling reaction. The solution was still catalytically active and yields increased by 98% and 62% for Sonogashira and Suzuki–Miyaura cross-coupling reactions, respectively, in comparison to the half-time yields.

#### **Procedure for mercury test and Crabtree's test for the Sonogashira cross-coupling reaction**

In two separate Schlenk flasks, a mixture of bromobenzene (13.1  $\mu\text{L}$ , 0.125 mmol, 1.0 equiv.), phenylacetylene (15.1  $\mu\text{L}$ , 0.137 mmol, 1.1 equiv.), DBU (23.3  $\mu\text{L}$ , 0.156 mmol, 1.25 eq.), **2** (4.1 mg, 0.006 mmol, 5 mol%) and 1,4-dioxane (1.0 mL) was heated under a nitrogen atmosphere for 30 minutes. After 30 minutes, for the mercury test, mercury (14  $\mu\text{L}$ , 0.937 mmol, 1500 mol%) and for Crabtree's test, DCT (6.4 mg, 0.031 mmol, 25 mol%) were added and the reaction mixture was stirred for 3.5 hours. The yields were determined by GC-MS using naphthalene as an internal standard (10  $\mu\text{L}$  of the reaction solution were diluted with 1.000 mL of a naphthalene stock solution in acetone).

#### **Procedure for mercury test and Crabtree's test for the Suzuki-Miyaura cross-coupling reaction**

In two separate Schlenk flasks, a mixture of bromobenzene (13.1  $\mu\text{L}$ , 0.125 mmol, 1.0 equiv.), *p*-tolylboronic acid (25.5 mg, 0.187 mmol, 1.5 equiv.), TMG (19.6  $\mu\text{L}$ , 0.156 mmol, 1.25 equiv.), **2** (4.1 mg, 0.006 mmol, 5 mol%) and toluene (1.0 mL) were heated under a nitrogen atmosphere for 30 minutes. After 30 minutes, for the mercury test, mercury (14  $\mu\text{L}$ , 0.937 mmol, 1500 mol%) and for Crabtree's test, DCT (6.4 mg, 0.031 mmol, 25 mol%) were added and the reaction mixture was stirred for 3.5 hours. The yields were determined by GC-MS using naphthalene as an internal standard (10  $\mu\text{L}$  of the reaction solution were diluted with 1.000 mL of a naphthalene stock solution in acetone).

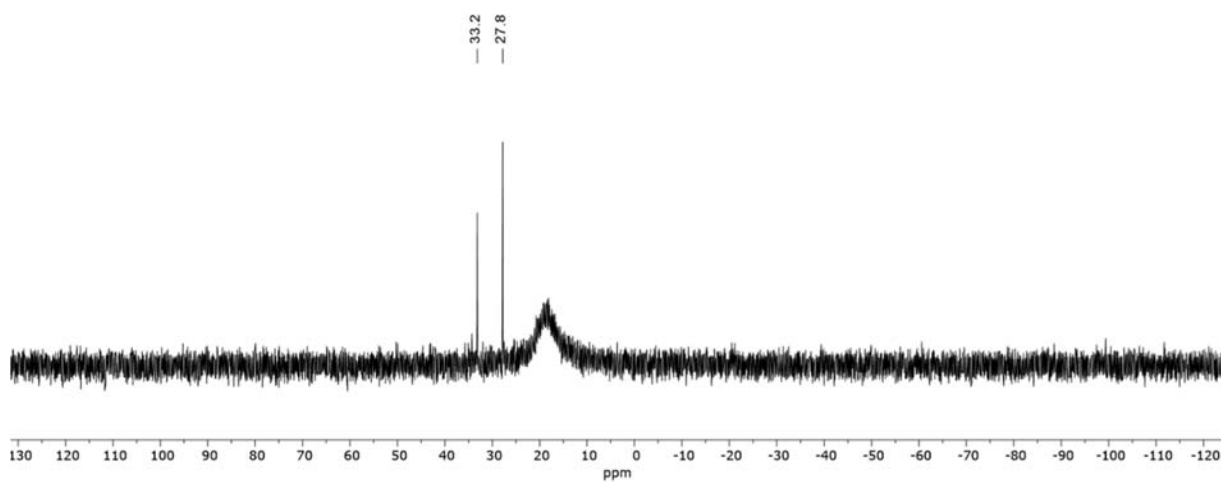

Figure S31.  $^{31}\text{P}\{^1\text{H}\}$  NMR spectrum for **2** reacting with Hg in toluene- $\text{d}_8$  at 25 °C

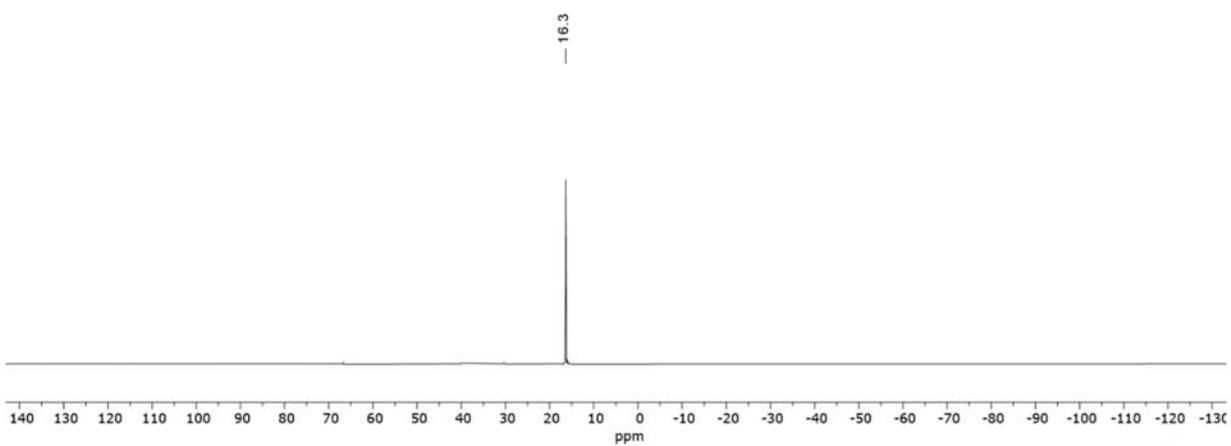

Figure S32.  $^{31}\text{P}\{^1\text{H}\}$  NMR spectrum for **2** not reacting with DCT in toluene- $\text{d}_8$  at 25 °C

## 5. DFT Calculations for *cis*- and *trans*-[MCl<sub>2</sub>(PCHO-κP)<sub>2</sub>] (M = Pd, Pt)

### Method

In order to estimate the relative stability of *cis*- and *trans*-[MCl<sub>2</sub>(PCHO-κP)<sub>2</sub>] (M = Pd, Pt), the single point energies of these structures were calculated. For this purpose we optimised the geometry of the X-ray crystal structures using density functional theory (DFT)<sup>6</sup> in ORCA 5.0 package.<sup>7</sup> The hybrid functional PBE0 has been chosen based on the results of benchmark studies for a set of the transition metal complexes.<sup>8</sup> In order to stabilise the optimised geometry via non-covalent interactions Becke-Johnson dispersion corrections of third order (D3BJ) were included in the functional.<sup>9</sup> The density fitting technique resolution-of-identity approximation (RI-J) and chain-of-sphere approximation (COSX)<sup>10</sup> in the geometry optimisation were applied in order to speed up the calculations. The polarised basis set def2-TZVPP<sup>11</sup> for all non-transition metals and with the additional zeroth order regular approximation (ZORA)<sup>12</sup> for the transition metal platinum was used for better convergence of the energies. The Conductor-like Polarizable Continuum Model (CPCM) was incorporated in this calculation in order to reproduce the stabilising effect of the solvent (toluene).<sup>13</sup>

The energy of *cis*- and *trans*-[PtCl<sub>2</sub>(PCHO-κP)<sub>2</sub>] were calculated as -13780284.4 kcal/mol (-21960.2764 E<sub>h</sub>) and -13780278.3 kcal/mol (-21960.2667 E<sub>h</sub>), respectively. The energy gap between *cis*- and *trans*-isomers is only 6.1 kcal/mol, indicating the preferable formation of the *cis*-configuration.

The energies of *cis*- and *trans*-[PdCl<sub>2</sub>(PCHO-κP)<sub>2</sub>] were calculated as -5035789.197 kcal/mol (-8025.1237 E<sub>h</sub>) and -5035797.041 kcal/mol (-8025.1362 E<sub>h</sub>), respectively. The energy gap is 7.8 kcal/mol indicating that the *trans* configuration of the Pd complex is more stable than the *cis* isomer.

Table S6. Selected experimental and calculated bond lengths and angles of *cis*-[PtCl<sub>2</sub>(PCHO-κP)<sub>2</sub>].

| Bond       | Bond lengths [pm] and angles | Bond lengths [pm] and angles |
|------------|------------------------------|------------------------------|
|            | [°] (exp)                    | [°] (calc)                   |
| P2-Pt      | 225.2(1)                     | 225.1                        |
| P1-Pt      | 225.1(1)                     | 224.8                        |
| Cl2-Pt     | 235.8(1)                     | 235.9                        |
| Cl1-Pt     | 233.4(1)                     | 234.0                        |
| P1-C10     | 181.9(5)                     | 181.5                        |
| P2-C19     | 182.5(5)                     | 182.0                        |
| P1-C1      | 182.9(5)                     | 182.8                        |
| P2-C16     | 183.3(5)                     | 182.9                        |
| Cl2-Pt-Cl1 | 86.73(5)                     | 87.1                         |
| P2-Pt-P1   | 98.71(5)                     | 97.2                         |
| P2-Pt-Cl2  | 84.26(5)                     | 84.4                         |
| P1-Pt-Cl1  | 90.22(5)                     | 91.4                         |

Table S7. Coordinates of the atoms of the optimised structure of *cis*-[PtCl<sub>2</sub>(PCHO-κP)<sub>2</sub>].

| Atom | X       | Y       | Z        |
|------|---------|---------|----------|
| Pt   | 5.80253 | 6.80537 | 7.72212  |
| Cl1  | 3.89543 | 7.25457 | 6.44201  |
| Cl2  | 6.22722 | 9.12519 | 7.68744  |
| P1   | 5.38378 | 4.60714 | 7.67132  |
| P2   | 7.55914 | 6.72709 | 9.12770  |
| O1   | 1.94756 | 2.90275 | 5.09949  |
| O2   | 6.62169 | 9.39360 | 12.79265 |
| C1   | 3.90019 | 4.04339 | 6.76434  |
| H1   | 3.73716 | 3.00950 | 7.07869  |
| H2   | 3.05722 | 4.63079 | 7.12952  |
| C2   | 4.00204 | 4.12742 | 5.25795  |
| H3   | 4.05228 | 5.16822 | 4.92232  |



|     |         |         |          |
|-----|---------|---------|----------|
| H4  | 4.91318 | 3.65150 | 4.87514  |
| C3  | 2.85633 | 3.47630 | 4.55581  |
| H5  | 2.89182 | 3.54887 | 3.45047  |
| C4  | 6.68200 | 3.61715 | 6.88439  |
| C5  | 7.72258 | 4.26977 | 6.23126  |
| H6  | 7.76977 | 5.35118 | 6.26343  |
| C6  | 8.68863 | 3.54915 | 5.54637  |
| H7  | 9.49474 | 4.07292 | 5.04728  |
| C7  | 8.61903 | 2.16504 | 5.50486  |
| H8  | 9.37493 | 1.59803 | 4.97508  |
| C8  | 7.56738 | 1.50614 | 6.12894  |
| H9  | 7.49783 | 0.42621 | 6.08147  |
| C9  | 6.59616 | 2.22649 | 6.80479  |
| H10 | 5.76671 | 1.69956 | 7.25953  |
| C10 | 5.01901 | 3.94559 | 9.32190  |
| C11 | 5.56919 | 2.78708 | 9.85448  |
| H11 | 6.34018 | 2.24876 | 9.32161  |
| C12 | 5.15885 | 2.33175 | 11.09864 |
| H12 | 5.60142 | 1.43242 | 11.50917 |
| C13 | 4.20438 | 3.03008 | 11.82075 |
| H13 | 3.88808 | 2.67120 | 12.79272 |
| C14 | 3.66044 | 4.19629 | 11.29859 |
| H14 | 2.91786 | 4.75096 | 11.85928 |
| C15 | 4.06598 | 4.65346 | 10.05614 |
| H15 | 3.64423 | 5.56728 | 9.65108  |
| C16 | 7.30717 | 7.92114 | 10.49003 |
| H16 | 8.00359 | 7.67672 | 11.29356 |
| H17 | 7.59834 | 8.88903 | 10.08351 |
| C17 | 5.87939 | 7.99593 | 10.99316 |
| H18 | 5.22141 | 8.40848 | 10.21976 |
| H19 | 5.44480 | 7.01669 | 11.22734 |
| C18 | 5.72128 | 8.84440 | 12.21223 |

|     |          |         |          |
|-----|----------|---------|----------|
| H20 | 4.67741  | 8.94382 | 12.57133 |
| C19 | 8.02492  | 5.19605 | 9.99514  |
| C20 | 8.83946  | 4.25945 | 9.36134  |
| H21 | 9.18482  | 4.43682 | 8.35231  |
| C21 | 9.23921  | 3.11115 | 10.02446 |
| H22 | 9.87529  | 2.39551 | 9.51777  |
| C22 | 8.84348  | 2.89100 | 11.33620 |
| H23 | 9.16488  | 1.99818 | 11.85890 |
| C23 | 8.04084  | 3.82196 | 11.97704 |
| H24 | 7.72686  | 3.65954 | 13.00067 |
| C24 | 7.63022  | 4.96527 | 11.31065 |
| H25 | 7.00243  | 5.67371 | 11.83301 |
| C25 | 9.13390  | 7.22367 | 8.37679  |
| C26 | 9.20597  | 7.60014 | 7.04033  |
| H27 | 8.30645  | 7.61504 | 6.43830  |
| C27 | 10.42005 | 7.98419 | 6.49022  |
| H28 | 10.46726 | 8.27663 | 5.44835  |
| C28 | 11.56381 | 8.00348 | 7.27374  |
| H29 | 12.51030 | 8.30871 | 6.84396  |
| C29 | 11.49567 | 7.63450 | 8.61117  |
| H30 | 12.38649 | 7.65102 | 9.22707  |
| C30 | 10.28725 | 7.24095 | 9.16036  |
| H31 | 10.24340 | 6.94026 | 10.20068 |

Table S8. Selected experimental and calculated bond lengths and angles of *trans*-[PtCl<sub>2</sub>(PCHO-κP)<sub>2</sub>].

| Bond       | Bond lengths [pm] and angles | Bond lengths [pm] and angles |
|------------|------------------------------|------------------------------|
|            | [°] (exp)                    | [°] (calc)                   |
| P2-Pt      | 231.61(7)                    | 231.2                        |
| P1-Pt      | 231.61(7)                    | 231.2                        |
| Cl2-Pt     | 230.71(7)                    | 230.7                        |
| Cl1-Pt     | 230.71(7)                    | 230.7                        |
| P1-C10     | 181.2(3)                     | 181.0                        |
| P2-C19     | 181.5(3)                     | 181.2                        |
| P1-C1      | 182.3(3)                     | 182.0                        |
| P2-C16     | 182.3(3)                     | 182.0                        |
| Cl2-Pt-Cl1 | 180.0                        | 180.0                        |
| P2-Pt-P1   | 89.77(2)                     | 89.5                         |
| P2-Pt-Cl2  | 89.77(2)                     | 89.5                         |
| P1-Pt-Cl1  | 90.23(2)                     | 90.5                         |

Table S9. Coordinates of the atoms of the optimised structure of *trans*-[PtCl<sub>2</sub>(PCHO-κP)<sub>2</sub>].

| Atom | X        | Y       | Z        |
|------|----------|---------|----------|
| Pt   | 1.12650  | 8.56810 | 4.80919  |
| Cl1  | 0.54477  | 7.31649 | 6.66438  |
| P1   | 0.28547  | 6.93281 | 3.41648  |
| O1   | -3.06962 | 4.47799 | 5.42211  |
| C1   | -0.92986 | 5.80490 | 4.16603  |
| C2   | -2.17778 | 6.54327 | 4.59969  |
| C3   | -3.19132 | 5.66349 | 5.25420  |
| C4   | -0.57443 | 7.48269 | 1.91973  |
| C5   | -1.26240 | 8.69277 | 1.92482  |
| C6   | -2.01683 | 9.06749 | 0.82379  |
| C7   | -2.08260 | 8.24081 | -0.28892 |

|     |          |          |          |
|-----|----------|----------|----------|
| C8  | -1.39545 | 7.03478  | -0.29934 |
| C9  | -0.64474 | 6.65439  | 0.80200  |
| C10 | 1.63095  | 5.87208  | 2.83385  |
| C11 | 2.56972  | 6.41190  | 1.95371  |
| C12 | 3.63934  | 5.64579  | 1.52427  |
| C13 | 3.78955  | 4.34001  | 1.97547  |
| C14 | 2.86496  | 3.80379  | 2.85779  |
| C15 | 1.78673  | 4.56541  | 3.28688  |
| H1  | -1.16581 | 5.02863  | 3.43523  |
| H2  | -0.46518 | 5.33432  | 5.03251  |
| H3  | -2.67853 | 7.04289  | 3.76180  |
| H4  | -1.93520 | 7.34066  | 5.31218  |
| H5  | -4.10673 | 6.18766  | 5.59381  |
| H6  | -1.19232 | 9.34501  | 2.78646  |
| H7  | -2.54649 | 10.01219 | 0.83222  |
| H8  | -2.66666 | 8.53856  | -1.15150 |
| H9  | -1.44247 | 6.38845  | -1.16756 |
| H10 | -0.10816 | 5.71298  | 0.78914  |
| H11 | 2.46057  | 7.43515  | 1.61336  |
| H12 | 4.36126  | 6.07004  | 0.83706  |
| H13 | 4.62912  | 3.74315  | 1.63972  |
| H14 | 2.97802  | 2.78730  | 3.21525  |
| H15 | 1.07364  | 4.13145  | 3.97535  |
| Cl2 | 1.70725  | 9.81946  | 2.95362  |
| P2  | 1.96928  | 10.20403 | 6.20028  |
| O2  | 5.33706  | 12.64302 | 4.19659  |
| C16 | 3.18945  | 11.32591 | 5.44972  |
| C17 | 4.43377  | 10.58133 | 5.01596  |
| C18 | 5.45252  | 11.45656 | 4.36325  |
| C19 | 2.82428  | 9.65513  | 7.70018  |
| C20 | 3.51038  | 8.44399  | 7.69897  |
| C21 | 4.25983  | 8.06916  | 8.80334  |

|     |          |          |          |
|-----|----------|----------|----------|
| C22 | 4.32251  | 8.89683  | 9.91548  |
| C23 | 3.63744  | 10.10403 | 9.92192  |
| C24 | 2.89153  | 10.48445 | 8.81732  |
| C25 | 0.62604  | 11.26999 | 6.77837  |
| C26 | -0.32121 | 10.73007 | 7.64937  |
| C27 | -1.38924 | 11.49949 | 8.07677  |
| C28 | -1.52963 | 12.80865 | 7.63224  |
| C29 | -0.59654 | 13.34509 | 6.75905  |
| C30 | 0.48039  | 12.58017 | 6.33235  |
| H16 | 3.42973  | 12.10167 | 6.17974  |
| H17 | 2.72610  | 11.79786 | 4.58322  |
| H18 | 4.93154  | 10.07821 | 5.85360  |
| H19 | 4.18724  | 9.78590  | 4.30254  |
| H20 | 6.36514  | 10.92778 | 4.02275  |
| H21 | 3.44236  | 7.79082  | 6.83792  |
| H22 | 4.78766  | 7.12346  | 8.79805  |
| H23 | 4.90248  | 8.59890  | 10.78076 |
| H24 | 3.68195  | 10.75105 | 10.78975 |
| H25 | 2.35606  | 11.42650 | 8.82733  |
| H26 | -0.21976 | 9.70416  | 7.98413  |
| H27 | -2.11786 | 11.07506 | 8.75681  |
| H28 | -2.36826 | 13.40803 | 7.96591  |
| H29 | -0.70198 | 14.36418 | 6.40676  |
| H30 | 1.20023  | 13.01438 | 5.65108  |

Table S10. Selected experimental and calculated bond lengths and angles of *trans*-[PdCl<sub>2</sub>(PCHO-κP)<sub>2</sub>].

| Bond       | Bond lengths [pm] and angles | Bond lengths [pm] and angles |
|------------|------------------------------|------------------------------|
|            | [°] (exp)                    | [°] (calc)                   |
| P2-Pd      | 233.21(3)                    | 232.9                        |
| P1-Pd      | 233.21(3)                    | 232.9                        |
| Cl2-Pd     | 229.95(3)                    | 230.1                        |
| Cl1-Pd     | 229.95(3)                    | 230.1                        |
| P1-C3      | 181.7(1)                     | 181.1                        |
| P2-C5      | 181.1(1)                     | 180.8                        |
| P1-C1      | 182.7(1)                     | 182.1                        |
| P2-C4      | 182.7(1)                     | 182.1                        |
| Cl2-Pd-Cl1 | 180.0                        | 180.0                        |
| P2-Pd-P1   | 179.99(1)                    | 179.9                        |
| P2-Pd-Cl2  | 89.84(1)                     | 89.4                         |
| P1-Pd-Cl1  | 89.84(1)                     | 89.4                         |

Table S11. Coordinates of the atoms of the optimised structure of *trans*-[PdCl<sub>2</sub>(PCHO-κP)<sub>2</sub>].

| Atom | X        | Y       | Z       |
|------|----------|---------|---------|
| Pd   | 1.74657  | 3.51988 | 4.82152 |
| Cl1  | 1.15969  | 2.26605 | 6.67150 |
| Cl2  | 2.33343  | 4.77363 | 2.97145 |
| P1   | 2.61221  | 5.14762 | 6.23026 |
| P2   | 0.87883  | 1.89329 | 3.41283 |
| C1   | 3.82431  | 6.28205 | 5.48272 |
| C2   | 1.25812  | 6.19776 | 6.80748 |
| C3   | 3.47266  | 4.59591 | 7.72556 |
| C4   | -0.33385 | 0.75958 | 4.16050 |
| C5   | 2.23192  | 0.84223 | 2.83487 |
| C6   | 0.01841  | 2.44633 | 1.91803 |

|     |          |          |         |
|-----|----------|----------|---------|
| C7  | 5.07097  | 5.54502  | 5.04293 |
| H1  | 3.35619  | 6.75160  | 4.61765 |
| H2  | 4.06093  | 7.05772  | 6.21421 |
| C8  | 0.34894  | 5.67207  | 7.72689 |
| C9  | 1.06214  | 7.48138  | 6.30539 |
| C10 | 4.14265  | 3.37590  | 7.72430 |
| C11 | 3.56073  | 5.43000  | 8.83791 |
| C12 | -1.57970 | 1.49743  | 4.60123 |
| H3  | 0.13438  | 0.28943  | 5.02519 |
| H4  | -0.57144 | -0.01568 | 3.42890 |
| C13 | 3.14168  | 1.36771  | 1.91592 |
| C14 | 2.42665  | -0.44195 | 3.33601 |
| C15 | -0.65053 | 3.66693  | 1.92025 |
| C16 | -0.07084 | 1.61297  | 0.80526 |
| C17 | 6.08960  | 6.42943  | 4.40217 |
| H5  | 4.82607  | 4.75853  | 4.31896 |
| H6  | 5.56858  | 5.03283  | 5.87523 |
| C18 | -0.73036 | 6.43003  | 8.14661 |
| H7  | 0.48813  | 4.66591  | 8.10426 |
| C19 | -0.02502 | 8.23437  | 6.72597 |
| H8  | 1.75063  | 7.90313  | 5.58491 |
| C20 | 4.89865  | 2.99721  | 8.82302 |
| H9  | 4.05708  | 2.71839  | 6.86824 |
| C21 | 4.31194  | 5.04519  | 9.93721 |
| H10 | 3.03800  | 6.37925  | 8.84758 |
| C22 | -2.59896 | 0.61347  | 5.24162 |
| H11 | -1.33386 | 2.28341  | 5.32539 |
| H12 | -2.07729 | 2.01035  | 3.76933 |
| C23 | 4.22023  | 0.60900  | 1.49564 |
| H13 | 3.00352  | 2.37430  | 1.53932 |
| C24 | 3.51308  | -1.19569 | 2.91491 |
| H14 | 1.73776  | -0.86360 | 4.05617 |

|     |          |          |          |
|-----|----------|----------|----------|
| C25 | -1.40662 | 4.04694  | 0.82206  |
| H15 | -0.56406 | 4.32387  | 2.77666  |
| C26 | -0.82211 | 1.99910  | -0.29356 |
| H16 | 0.45100  | 0.66324  | 0.79487  |
| O1  | 5.97310  | 7.61766  | 4.25039  |
| H17 | 7.00306  | 5.90595  | 4.05586  |
| C27 | -0.91983 | 7.71273  | 7.64736  |
| H18 | -1.42884 | 6.01698  | 8.86430  |
| H19 | -0.16882 | 9.23286  | 6.33123  |
| C28 | 4.98227  | 3.82944  | 9.93008  |
| H20 | 5.41468  | 2.04489  | 8.81741  |
| H21 | 4.37306  | 5.69581  | 10.80121 |
| O2  | -2.48367 | -0.57503 | 5.39215  |
| H22 | -3.51152 | 1.13765  | 5.58925  |
| C29 | 4.40843  | -0.67427 | 1.99392  |
| H23 | 4.91914  | 1.02192  | 0.77828  |
| H24 | 3.65589  | -2.19461 | 3.30893  |
| C30 | -1.49135 | 3.21543  | -0.28547 |
| H25 | -1.92182 | 4.99970  | 0.82841  |
| H26 | -0.88413 | 1.34904  | -1.15792 |
| H27 | -1.76655 | 8.30320  | 7.97620  |
| H28 | 5.56712  | 3.52866  | 10.79107 |
| H29 | 5.25458  | -1.26531 | 1.66466  |
| H30 | -2.07624 | 3.51723  | -1.14608 |



Table S12. Coordinates of the atoms of the optimised structure of *cis*-[PdCl<sub>2</sub>(**PCHO**-κ*P*)<sub>2</sub>] (no experimental data are available for *cis*-[PdCl<sub>2</sub>(**PCHO**-κ*P*)<sub>2</sub>]).

| Atom | X       | Y       | Z        |
|------|---------|---------|----------|
| Pd   | 5.82084 | 6.83967 | 7.72710  |
| Cl1  | 3.90000 | 7.28962 | 6.47677  |
| Cl2  | 6.30390 | 9.14255 | 7.75756  |
| P1   | 5.35349 | 4.63007 | 7.67833  |
| P2   | 7.60777 | 6.71558 | 9.13294  |
| O1   | 1.98603 | 2.95550 | 5.00620  |
| O2   | 6.51868 | 9.20137 | 12.87772 |
| C1   | 3.89052 | 4.07593 | 6.73181  |
| H1   | 3.72152 | 3.03909 | 7.03417  |
| H2   | 3.03818 | 4.66319 | 7.07339  |
| C2   | 4.03762 | 4.17347 | 5.23057  |
| H3   | 4.09797 | 5.21857 | 4.90923  |
| H4   | 4.95844 | 3.69920 | 4.86934  |
| C3   | 2.90990 | 3.53151 | 4.49151  |
| H5   | 2.97500 | 3.61343 | 3.38829  |
| C4   | 6.65012 | 3.59750 | 6.95120  |
| C5   | 7.65892 | 4.21364 | 6.21731  |
| H6   | 7.69211 | 5.29520 | 6.16389  |
| C6   | 8.61624 | 3.45494 | 5.56191  |
| H7   | 9.39822 | 3.94769 | 4.99726  |
| C7   | 8.57049 | 2.07109 | 5.63531  |
| H8   | 9.32167 | 1.47532 | 5.13101  |
| C8   | 7.55009 | 1.44763 | 6.34222  |
| H9   | 7.50050 | 0.36642 | 6.38540  |
| C9   | 6.58550 | 2.20449 | 6.98653  |
| H10  | 5.78030 | 1.70551 | 7.51116  |
| C10  | 4.92378 | 4.02150 | 9.33096  |
| C11  | 5.55025 | 2.96507 | 9.97895  |

|     |          |         |          |
|-----|----------|---------|----------|
| H11 | 6.40601  | 2.47593 | 9.53391  |
| C12 | 5.10070  | 2.55000 | 11.22425 |
| H12 | 5.59933  | 1.72797 | 11.72307 |
| C13 | 4.03603  | 3.19230 | 11.83495 |
| H13 | 3.68936  | 2.86557 | 12.80787 |
| C14 | 3.41874  | 4.26302 | 11.19983 |
| H14 | 2.59097  | 4.77568 | 11.67445 |
| C15 | 3.85973  | 4.67742 | 9.95517  |
| H15 | 3.37882  | 5.51727 | 9.46409  |
| C16 | 7.30958  | 7.84330 | 10.53925 |
| H16 | 8.00559  | 7.59458 | 11.34160 |
| H17 | 7.56126  | 8.83763 | 10.17302 |
| C17 | 5.87265  | 7.83081 | 11.02243 |
| H18 | 5.20602  | 8.23387 | 10.25091 |
| H19 | 5.48610  | 6.82354 | 11.22132 |
| C18 | 5.65383  | 8.63161 | 12.26431 |
| H20 | 4.60062  | 8.67202 | 12.60679 |
| C19 | 8.12909  | 5.16939 | 9.94160  |
| C20 | 8.93586  | 4.26876 | 9.24699  |
| H21 | 9.24135  | 4.48761 | 8.23345  |
| C21 | 9.37635  | 3.10467 | 9.85277  |
| H22 | 10.00203 | 2.41697 | 9.29698  |
| C22 | 9.03372  | 2.83288 | 11.17062 |
| H23 | 9.38803  | 1.92810 | 11.64958 |
| C23 | 8.24522  | 3.72967 | 11.87376 |
| H24 | 7.97541  | 3.52908 | 12.90327 |
| C24 | 7.78842  | 4.88676 | 11.26187 |
| H25 | 7.16648  | 5.56422 | 11.83071 |
| C25 | 9.16062  | 7.26541 | 8.37693  |
| C26 | 9.22487  | 7.59713 | 7.02855  |
| H26 | 8.32713  | 7.56649 | 6.42452  |
| C27 | 10.42833 | 7.99807 | 6.46787  |

|     |          |         |          |
|-----|----------|---------|----------|
| H27 | 10.47013 | 8.25580 | 5.41669  |
| C28 | 11.56785 | 8.08119 | 7.25353  |
| H28 | 12.50562 | 8.40166 | 6.81587  |
| C29 | 11.50682 | 7.75732 | 8.60289  |
| H29 | 12.39437 | 7.82413 | 9.22010  |
| C30 | 10.30989 | 7.34343 | 9.16240  |
| H30 | 10.27237 | 7.07566 | 10.21195 |

### 6. *trans*-[PdCl<sub>2</sub>(PPh<sub>2</sub>*n*Bu)<sub>2</sub>]

Synthesis:<sup>14</sup> PPh<sub>2</sub>*n*Bu (168.1 mg, 0.69 mmol) in chloroform (5 mL) was added to a suspension of [PdCl<sub>2</sub>(CH<sub>3</sub>CN)<sub>2</sub>] (90.0 mg, 0.34 mmol) in chloroform (5 mL) under a nitrogen atmosphere. The reaction mixture was stirred for 3 h. The solvent was completely removed and the yellow residue was dissolved in toluene (1 mL). Addition of *n*-hexane (6 mL) led to formation of fine yellow crystals within a few minutes. The mixture was cooled in an ice bath, filtered, the solid washed with cold *n*-hexane (3 × 5 mL) and dried in vacuum. Yield: 168 mg, 74%. <sup>1</sup>H NMR (400 MHz, C<sub>6</sub>D<sub>6</sub>) δ = 7.87 – 7.78 (m, 4H), 7.03 (m, 6H), 2.51 (m, 2H), 1.59 (m, 2H), 1.27 (m, 2H), 0.73 (t, 3H, *J* = 7.3 Hz). <sup>31</sup>P{<sup>1</sup>H} NMR (162 MHz, C<sub>6</sub>D<sub>6</sub>) δ = -16.4.

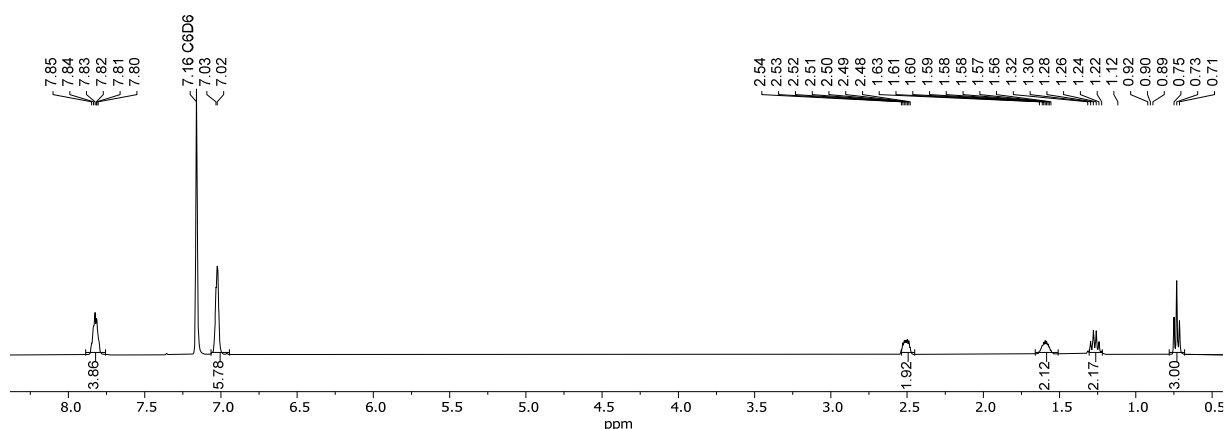

Figure S33. <sup>1</sup>H NMR spectrum of *trans*-[PdCl<sub>2</sub>(PPh<sub>2</sub>*n*Bu)<sub>2</sub>] in C<sub>6</sub>D<sub>6</sub> at 25 °C

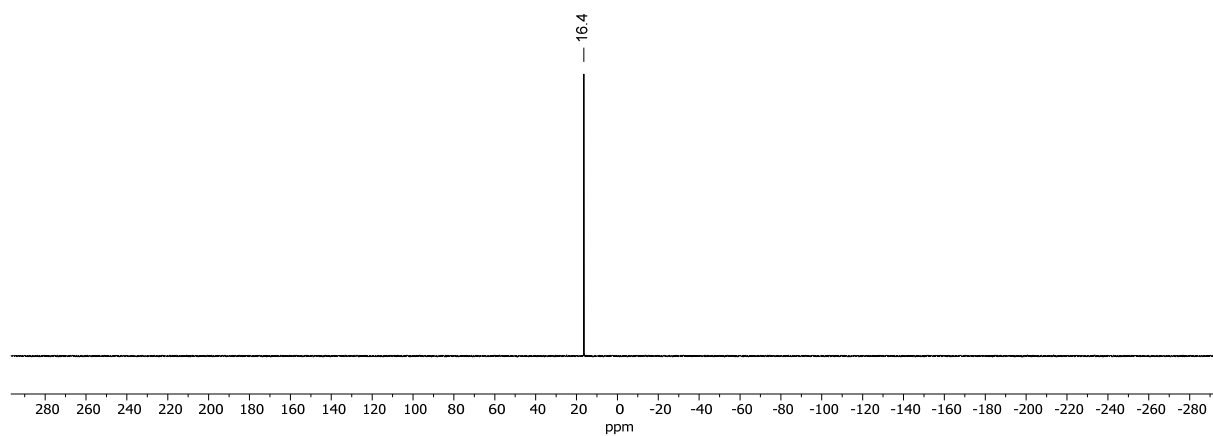

Figure S34.  $^{31}\text{P}\{^1\text{H}\}$  NMR spectrum of *trans*-[PdCl<sub>2</sub>(PPh<sub>2</sub>*n*Bu)<sub>2</sub>] in C<sub>6</sub>D<sub>6</sub> at 25 °C

## 7. References

- 1 T. Fantoni, S. Bernardoni, A. Mattellone, G. Martelli, L. Ferrazzano, P. Cantelmi, D. Corbisiero, A. Tolomelli, W. Cabri, F. Vacondio, F. Ferlenghi, M. Mor and A. Ricci, *ChemSusChem*, 2021, **14**, 2591–2600.
- 2 G. Kurpik, A. Walczak, M. Gołdyn, J. Harrowfield and A. R. Stefankiewicz, *Inorg. Chem.*, 2022, **61**, 14019–14029.
- 3 V. M. Chernyshev, A. V. Astakhov, I. E. Chikunov, R. V. Tyurin, D. B. Eremin, G. S. Ranny, V. N. Khrustalev and V. P. Ananikov, *ACS Catal.*, 2019, **9**, 2984–2995.
- 4 D. R. Anton and R. H. Crabtree, *Organometallics*, 1983, **2**, 855–859.
- 5 J. E. Hamlin, K. Hirai, A. Millan and P. M. Maitlis, *J. Mol. Catal. A: Chem.*, 1980, **7**, 534–544.
- 6 W. Kohn, *Density Functional Theory: Basic Results and Some Observations. In Density Functional Methods In Physics; Dreizler, R. M., da Providência, J.*, NATO ASI Series; Springer US: Boston, MA, 1985.
- 7 F. Neese, *Wiley Interdiscip. Rev.: Comput. Mol. Sci.*, 2012, **2**, 73–78.
- 8 a) C. J. Cramer and D. G. Truhlar, *Phys. Chem. Chem. Phys.*, 2009, **11**, 10757–10816; b) T. Weymuth, E. P. A. Couzijn, P. Chen and M. Reiher, *J. Chem. Theory Comput.*, 2014, **10**, 3092–3103.
- 9 H. Schröder, A. Creon and T. Schwabe, *J. Chem. Theory Comput.*, 2015, **11**, 3163–3170.
- 10 S. Kossmann and F. Neese, *J. Chem. Theory Comput.*, 2010, **6**, 2325–2338.
- 11 A. Hellweg and D. Rappoport, *Phys. Chem. Chem. Phys.*, 2015, **17**, 1010–1017.
- 12 E. van Lenthe, J. G. Snijders and E. J. Baerends, *J. Chem. Phys.*, 1996, **105**, 6505–6516.
- 13 B. Mennucci, *Wiley Interdiscip. Rev.: Comput. Mol. Sci.*, 2012, **2**, 386–404.
- 14 a) T. Bartik and T. Himmler, *J. Organomet. Chem.*, 1985, **293**, 343–351; b) S. O. Grim and R. L. Keiter, *Inorg. Chim. Acta*, 1970, **4**, 56–60.
